# Supplementary material for: Position-Specific Analysis and Prediction of Protein Pupylation Sites Based on Multiple Features
Source: Biomed Res Int. 2013 Aug 26;2013:109549. doi: 10.1155/2013/109549 (PMC3770009; doi:10.1155/2013/109549)
Supplement: Supplementary file 2 [file 109549.f2.txt]

*** MaxRel features ***
Order 	 Fea 	 Name 	 Score
1 	 433 	 AA11_pssm_12 	 0.057
2 	 22 	 AA11_sa_2 	 0.050
3 	 21 	 AA11_sa_1 	 0.050
4 	 430 	 AA11_pssm_4 	 0.043
5 	 353 	 AA7_pssm_7 	 0.031
6 	 427 	 AA11_pssm_1 	 0.026
7 	 14 	 AA7_sa_2 	 0.023
8 	 13 	 AA7_sa_1 	 0.023
9 	 413 	 AA10_pssm_7 	 0.021
10 	 493 	 AA14_pssm_7 	 0.021
11 	 350 	 AA7_pssm_4 	 0.020
12 	 442 	 AA11_pssm_16 	 0.018
13 	 422 	 AA10_pssm_16 	 0.017
14 	 432 	 AA11_pssm_6 	 0.016
15 	 356 	 AA7_pssm_10 	 0.014
16 	 372 	 AA8_pssm_6 	 0.014
17 	 113 	 AA10_electrostatic 	 0.013
18 	 642 	 AA21_pssm_16 	 0.013
19 	 158 	 AA20_electrostatic 	 0.013
20 	 41 	 AA21_sa_1 	 0.013
21 	 27 	 AA14_sa_1 	 0.012
22 	 111 	 AA10_molecular 	 0.012
23 	 28 	 AA14_sa_2 	 0.012
24 	 16 	 AA8_sa_2 	 0.011
25 	 52 	 AA10_disorder 	 0.011
26 	 378 	 AA8_pssm_12 	 0.011
27 	 8 	 AA4_sa_2 	 0.011
28 	 95 	 AA7_structure 	 0.010
29 	 290 	 AA4_pssm_4 	 0.010
30 	 507 	 AA15_pssm_1 	 0.010
31 	 412 	 AA10_pssm_6 	 0.010
32 	 7 	 AA4_sa_1 	 0.010
33 	 294 	 AA4_pssm_8 	 0.010
34 	 15 	 AA8_sa_1 	 0.010
35 	 362 	 AA7_pssm_16 	 0.009
36 	 368 	 AA8_pssm_2 	 0.009
37 	 447 	 AA12_pssm_1 	 0.009
38 	 347 	 AA7_pssm_1 	 0.009
39 	 510 	 AA15_pssm_4 	 0.009
40 	 468 	 AA13_pssm_2 	 0.009
41 	 97 	 AA7_codon 	 0.009
42 	 487 	 AA14_pssm_1 	 0.009
43 	 490 	 AA14_pssm_4 	 0.009
44 	 606 	 AA19_pssm_20 	 0.008
45 	 352 	 AA7_pssm_6 	 0.008
46 	 268 	 AA3_pssm_2 	 0.008
47 	 51 	 AA9_disorder 	 0.008
48 	 192 	 AA10_ss_2 	 0.008
49 	 53 	 AA11_disorder 	 0.008
50 	 358 	 AA7_pssm_12 	 0.008
51 	 106 	 AA9_molecular 	 0.008
52 	 128 	 AA14_electrostatic 	 0.008
53 	 573 	 AA18_pssm_7 	 0.008
54 	 37 	 AA19_sa_1 	 0.008
55 	 195 	 AA11_ss_2 	 0.008
56 	 159 	 AA21_Polarity 	 0.008
57 	 163 	 AA21_electrostatic 	 0.008
58 	 127 	 AA14_codon 	 0.007
59 	 47 	 AA5_disorder 	 0.007
60 	 96 	 AA7_molecular 	 0.007
61 	 492 	 AA14_pssm_6 	 0.007
62 	 388 	 AA9_pssm_2 	 0.007
63 	 267 	 AA3_pssm_1 	 0.007
64 	 156 	 AA20_molecular 	 0.007
65 	 63 	 AA21_disorder 	 0.007
66 	 42 	 AA21_sa_2 	 0.007
67 	 458 	 AA12_pssm_12 	 0.007
68 	 65 	 AA1_structure 	 0.007
69 	 302 	 AA4_pssm_16 	 0.007
70 	 428 	 AA11_pssm_2 	 0.007
71 	 72 	 AA2_codon 	 0.007
72 	 495 	 AA14_pssm_9 	 0.007
73 	 593 	 AA19_pssm_7 	 0.007
74 	 293 	 AA4_pssm_7 	 0.006
75 	 50 	 AA8_disorder 	 0.006
76 	 529 	 AA16_pssm_3 	 0.006
77 	 24 	 AA12_sa_2 	 0.006
78 	 275 	 AA3_pssm_9 	 0.006
79 	 429 	 AA11_pssm_3 	 0.006
80 	 142 	 AA17_codon 	 0.006
81 	 99 	 AA8_Polarity 	 0.006
82 	 359 	 AA7_pssm_13 	 0.006
83 	 125 	 AA14_structure 	 0.006
84 	 218 	 AA19_ss_1 	 0.006
85 	 423 	 AA10_pssm_17 	 0.006
86 	 397 	 AA9_pssm_11 	 0.006
87 	 314 	 AA5_pssm_8 	 0.006
88 	 189 	 AA9_ss_2 	 0.006
89 	 89 	 AA6_Polarity 	 0.006
90 	 123 	 AA13_electrostatic 	 0.005
91 	 628 	 AA21_pssm_2 	 0.005
92 	 79 	 AA4_Polarity 	 0.005
93 	 155 	 AA20_structure 	 0.005
94 	 6 	 AA3_sa_2 	 0.005
95 	 23 	 AA12_sa_1 	 0.005
96 	 637 	 AA21_pssm_11 	 0.005
97 	 92 	 AA6_codon 	 0.005
98 	 366 	 AA7_pssm_20 	 0.005
99 	 635 	 AA21_pssm_9 	 0.005
100 	 513 	 AA15_pssm_7 	 0.005
101 	 367 	 AA8_pssm_1 	 0.005
102 	 448 	 AA12_pssm_2 	 0.005
103 	 373 	 AA8_pssm_7 	 0.005
104 	 62 	 AA20_disorder 	 0.005
105 	 80 	 AA4_structure 	 0.005
106 	 221 	 AA20_ss_1 	 0.005
107 	 108 	 AA9_electrostatic 	 0.005
108 	 255 	 AA2_pssm_9 	 0.005
109 	 5 	 AA3_sa_1 	 0.005
110 	 29 	 AA15_sa_1 	 0.005
111 	 40 	 AA20_sa_2 	 0.005
112 	 82 	 AA4_codon 	 0.004
113 	 608 	 AA20_pssm_2 	 0.004
114 	 77 	 AA3_codon 	 0.004
115 	 38 	 AA19_sa_2 	 0.004
116 	 48 	 AA6_disorder 	 0.004
117 	 222 	 AA20_ss_2 	 0.004
118 	 612 	 AA20_pssm_6 	 0.004
119 	 363 	 AA7_pssm_17 	 0.004
120 	 120 	 AA13_structure 	 0.004
121 	 227 	 AA1_pssm_1 	 0.004
122 	 54 	 AA12_disorder 	 0.004
123 	 603 	 AA19_pssm_17 	 0.004
124 	 86 	 AA5_molecular 	 0.004
125 	 526 	 AA15_pssm_20 	 0.004
126 	 523 	 AA15_pssm_17 	 0.004
127 	 147 	 AA18_codon 	 0.004
128 	 505 	 AA14_pssm_19 	 0.004
129 	 262 	 AA2_pssm_16 	 0.004
130 	 208 	 AA15_ss_3 	 0.004
131 	 129 	 AA15_Polarity 	 0.004
132 	 88 	 AA5_electrostatic 	 0.004
133 	 197 	 AA12_ss_1 	 0.004
134 	 45 	 AA3_disorder 	 0.004
135 	 410 	 AA10_pssm_4 	 0.004
136 	 613 	 AA20_pssm_7 	 0.004
137 	 411 	 AA10_pssm_5 	 0.004
138 	 396 	 AA9_pssm_10 	 0.004
139 	 453 	 AA12_pssm_7 	 0.004
140 	 109 	 AA10_Polarity 	 0.004
141 	 94 	 AA7_Polarity 	 0.004
142 	 407 	 AA10_pssm_1 	 0.004
143 	 140 	 AA17_structure 	 0.004
144 	 245 	 AA1_pssm_19 	 0.004
145 	 46 	 AA4_disorder 	 0.004
146 	 152 	 AA19_codon 	 0.004
147 	 61 	 AA19_disorder 	 0.003
148 	 278 	 AA3_pssm_12 	 0.003
149 	 452 	 AA12_pssm_6 	 0.003
150 	 296 	 AA4_pssm_10 	 0.003
151 	 283 	 AA3_pssm_17 	 0.003
152 	 354 	 AA7_pssm_8 	 0.003
153 	 55 	 AA13_disorder 	 0.003
154 	 190 	 AA9_ss_3 	 0.003
155 	 43 	 AA1_disorder 	 0.003
156 	 601 	 AA19_pssm_15 	 0.003
157 	 578 	 AA18_pssm_12 	 0.003
158 	 235 	 AA1_pssm_9 	 0.003
159 	 20 	 AA10_sa_2 	 0.003
160 	 19 	 AA10_sa_1 	 0.003
161 	 591 	 AA19_pssm_5 	 0.003
162 	 103 	 AA8_electrostatic 	 0.003
163 	 328 	 AA6_pssm_2 	 0.003
164 	 438 	 AA11_pssm_7 	 0.003
165 	 627 	 AA21_pssm_1 	 0.003
166 	 242 	 AA1_pssm_16 	 0.003
167 	 357 	 AA7_pssm_11 	 0.003
168 	 132 	 AA15_codon 	 0.003
169 	 193 	 AA10_ss_3 	 0.003
170 	 443 	 AA11_pssm_17 	 0.003
171 	 611 	 AA20_pssm_5 	 0.003
172 	 70 	 AA2_structure 	 0.003
173 	 198 	 AA12_ss_2 	 0.003
174 	 566 	 AA17_pssm_20 	 0.003
175 	 620 	 AA20_pssm_14 	 0.003
176 	 75 	 AA3_structure 	 0.003
177 	 485 	 AA13_pssm_19 	 0.003
178 	 44 	 AA2_disorder 	 0.003
179 	 486 	 AA13_pssm_20 	 0.003
180 	 30 	 AA15_sa_2 	 0.003
181 	 534 	 AA16_pssm_8 	 0.003
182 	 122 	 AA13_codon 	 0.003
183 	 406 	 AA9_pssm_20 	 0.003
184 	 219 	 AA19_ss_2 	 0.003
185 	 196 	 AA11_ss_3 	 0.003
186 	 477 	 AA13_pssm_11 	 0.003
187 	 374 	 AA8_pssm_8 	 0.003
188 	 478 	 AA13_pssm_12 	 0.003
189 	 260 	 AA2_pssm_14 	 0.003
190 	 421 	 AA10_pssm_15 	 0.003
191 	 625 	 AA20_pssm_19 	 0.003
192 	 604 	 AA19_pssm_18 	 0.003
193 	 137 	 AA16_codon 	 0.003
194 	 136 	 AA16_molecular 	 0.003
195 	 527 	 AA16_pssm_1 	 0.003
196 	 183 	 AA7_ss_2 	 0.003
197 	 191 	 AA10_ss_1 	 0.003
198 	 116 	 AA12_molecular 	 0.003
199 	 323 	 AA5_pssm_17 	 0.003
200 	 60 	 AA18_disorder 	 0.003
201 	 49 	 AA7_disorder 	 0.003
202 	 592 	 AA19_pssm_6 	 0.003
203 	 150 	 AA19_structure 	 0.003
204 	 550 	 AA17_pssm_4 	 0.003
205 	 445 	 AA11_pssm_19 	 0.003
206 	 327 	 AA6_pssm_1 	 0.003
207 	 194 	 AA11_ss_1 	 0.003
208 	 567 	 AA18_pssm_1 	 0.003
209 	 184 	 AA7_ss_3 	 0.003
210 	 326 	 AA5_pssm_20 	 0.003
211 	 225 	 AA21_ss_2 	 0.002
212 	 56 	 AA14_disorder 	 0.002
213 	 153 	 AA19_electrostatic 	 0.002
214 	 575 	 AA18_pssm_9 	 0.002
215 	 241 	 AA1_pssm_15 	 0.002
216 	 535 	 AA16_pssm_9 	 0.002
217 	 138 	 AA16_electrostatic 	 0.002
218 	 441 	 AA11_pssm_15 	 0.002
219 	 249 	 AA2_pssm_3 	 0.002
220 	 336 	 AA6_pssm_10 	 0.002
221 	 403 	 AA9_pssm_17 	 0.002
222 	 149 	 AA19_Polarity 	 0.002
223 	 178 	 AA5_ss_3 	 0.002
224 	 496 	 AA14_pssm_10 	 0.002
225 	 69 	 AA2_Polarity 	 0.002
226 	 392 	 AA9_pssm_6 	 0.002
227 	 162 	 AA21_codon 	 0.002
228 	 115 	 AA12_structure 	 0.002
229 	 292 	 AA4_pssm_6 	 0.002
230 	 602 	 AA19_pssm_16 	 0.002
231 	 596 	 AA19_pssm_10 	 0.002
232 	 126 	 AA14_molecular 	 0.002
233 	 66 	 AA1_molecular 	 0.002
234 	 622 	 AA20_pssm_16 	 0.002
235 	 139 	 AA17_Polarity 	 0.002
236 	 502 	 AA14_pssm_16 	 0.002
237 	 632 	 AA21_pssm_6 	 0.002
238 	 387 	 AA9_pssm_1 	 0.002
239 	 524 	 AA15_pssm_18 	 0.002
240 	 449 	 AA12_pssm_3 	 0.002
241 	 519 	 AA15_pssm_13 	 0.002
242 	 281 	 AA3_pssm_15 	 0.002
243 	 473 	 AA13_pssm_7 	 0.002
244 	 306 	 AA4_pssm_20 	 0.002
245 	 303 	 AA4_pssm_17 	 0.002
246 	 301 	 AA4_pssm_15 	 0.002
247 	 124 	 AA14_Polarity 	 0.002
248 	 572 	 AA18_pssm_6 	 0.002
249 	 624 	 AA20_pssm_18 	 0.002
250 	 145 	 AA18_structure 	 0.002
251 	 33 	 AA17_sa_1 	 0.002
252 	 381 	 AA8_pssm_15 	 0.002
253 	 321 	 AA5_pssm_15 	 0.002
254 	 180 	 AA6_ss_2 	 0.002
255 	 459 	 AA12_pssm_13 	 0.002
256 	 307 	 AA5_pssm_1 	 0.002
257 	 636 	 AA21_pssm_10 	 0.002
258 	 101 	 AA8_molecular 	 0.002
259 	 151 	 AA19_molecular 	 0.002
260 	 244 	 AA1_pssm_18 	 0.002
261 	 401 	 AA9_pssm_15 	 0.002
262 	 476 	 AA13_pssm_10 	 0.002
263 	 467 	 AA13_pssm_1 	 0.002
264 	 1 	 AA1_sa_1 	 0.002
265 	 479 	 AA13_pssm_13 	 0.002
266 	 583 	 AA18_pssm_17 	 0.002
267 	 590 	 AA19_pssm_4 	 0.002
268 	 203 	 AA14_ss_1 	 0.002
269 	 551 	 AA17_pssm_5 	 0.002
270 	 516 	 AA15_pssm_10 	 0.002
271 	 364 	 AA7_pssm_18 	 0.002
272 	 181 	 AA6_ss_3 	 0.002
273 	 391 	 AA9_pssm_5 	 0.002
274 	 600 	 AA19_pssm_14 	 0.002
275 	 186 	 AA8_ss_2 	 0.002
276 	 67 	 AA1_codon 	 0.002
277 	 228 	 AA1_pssm_2 	 0.002
278 	 501 	 AA14_pssm_15 	 0.002
279 	 157 	 AA20_codon 	 0.002
280 	 584 	 AA18_pssm_18 	 0.001
281 	 84 	 AA5_Polarity 	 0.001
282 	 494 	 AA14_pssm_8 	 0.001
283 	 585 	 AA18_pssm_19 	 0.001
284 	 2 	 AA1_sa_2 	 0.001
285 	 630 	 AA21_pssm_4 	 0.001
286 	 217 	 AA18_ss_3 	 0.001
287 	 380 	 AA8_pssm_14 	 0.001
288 	 207 	 AA15_ss_2 	 0.001
289 	 81 	 AA4_molecular 	 0.001
290 	 371 	 AA8_pssm_5 	 0.001
291 	 318 	 AA5_pssm_12 	 0.001
292 	 574 	 AA18_pssm_8 	 0.001
293 	 386 	 AA8_pssm_20 	 0.001
294 	 629 	 AA21_pssm_3 	 0.001
295 	 272 	 AA3_pssm_6 	 0.001
296 	 170 	 AA3_ss_1 	 0.001
297 	 324 	 AA5_pssm_18 	 0.001
298 	 224 	 AA21_ss_1 	 0.001
299 	 102 	 AA8_codon 	 0.001
300 	 408 	 AA10_pssm_2 	 0.001
301 	 332 	 AA6_pssm_6 	 0.001
302 	 304 	 AA4_pssm_18 	 0.001
303 	 342 	 AA6_pssm_16 	 0.001
304 	 646 	 AA21_pssm_20
 	 0.001
305 	 39 	 AA20_sa_1 	 0.001
306 	 117 	 AA12_codon 	 0.001
307 	 320 	 AA5_pssm_14 	 0.001
308 	 498 	 AA14_pssm_12 	 0.001
309 	 100 	 AA8_structure 	 0.001
310 	 35 	 AA18_sa_1 	 0.001
311 	 118 	 AA12_electrostatic 	 0.001
312 	 506 	 AA14_pssm_20 	 0.001
313 	 239 	 AA1_pssm_13 	 0.001
314 	 344 	 AA6_pssm_18 	 0.001
315 	 456 	 AA12_pssm_10 	 0.001
316 	 172 	 AA3_ss_3 	 0.001
317 	 286 	 AA3_pssm_20 	 0.001
318 	 365 	 AA7_pssm_19 	 0.001
319 	 594 	 AA19_pssm_8 	 0.001
320 	 201 	 AA13_ss_2 	 0.001
321 	 232 	 AA1_pssm_6 	 0.001
322 	 214 	 AA17_ss_3 	 0.001
323 	 389 	 AA9_pssm_3 	 0.001
324 	 215 	 AA18_ss_1 	 0.001
325 	 110 	 AA10_structure 	 0.001
326 	 31 	 AA16_sa_1 	 0.001
327 	 90 	 AA6_structure 	 0.001
328 	 346 	 AA6_pssm_20 	 0.001
329 	 177 	 AA5_ss_2 	 0.001
330 	 130 	 AA15_structure 	 0.001
331 	 462 	 AA12_pssm_16 	 0.001
332 	 530 	 AA16_pssm_4 	 0.001
333 	 638 	 AA21_pssm_12 	 0.001
334 	 623 	 AA20_pssm_17 	 0.001
335 	 85 	 AA5_structure 	 0.001
336 	 141 	 AA17_molecular 	 0.001
337 	 220 	 AA19_ss_3 	 0.001
338 	 609 	 AA20_pssm_3 	 0.001
339 	 211 	 AA16_ss_3 	 0.001
340 	 282 	 AA3_pssm_16 	 0.001
341 	 83 	 AA4_electrostatic 	 0.001
342 	 544 	 AA16_pssm_18 	 0.001
343 	 607 	 AA20_pssm_1 	 0.001
344 	 261 	 AA2_pssm_15 	 0.001
345 	 73 	 AA2_electrostatic 	 0.001
346 	 279 	 AA3_pssm_13 	 0.001
347 	 254 	 AA2_pssm_8 	 0.001
348 	 419 	 AA10_pssm_13 	 0.001
349 	 497 	 AA14_pssm_11 	 0.001
350 	 405 	 AA9_pssm_19 	 0.001
351 	 461 	 AA12_pssm_15 	 0.001
352 	 404 	 AA9_pssm_18 	 0.001
353 	 587 	 AA19_pssm_1 	 0.001
354 	 87 	 AA5_codon 	 0.001
355 	 446 	 AA11_pssm_20 	 0.001
356 	 10 	 AA_5_sa_2 	 0.001
357 	 34 	 AA17_sa_2 	 0.001
358 	 457 	 AA12_pssm_11 	 0.001
359 	 204 	 AA14_ss_2 	 0.001
360 	 395 	 AA9_pssm_9 	 0.001
361 	 333 	 AA6_pssm_7 	 0.001
362 	 548 	 AA17_pssm_2 	 0.001
363 	 540 	 AA16_pssm_14 	 0.001
364 	 597 	 AA19_pssm_11 	 0.001
365 	 200 	 AA13_ss_1 	 0.001
366 	 309 	 AA5_pssm_3 	 0.001
367 	 107 	 AA9_codon 	 0.001
368 	 71 	 AA2_molecular 	 0.001
369 	 560 	 AA17_pssm_14 	 0.001
370 	 325 	 AA5_pssm_19 	 0.001
371 	 233 	 AA1_pssm_7 	 0.001
372 	 451 	 AA12_pssm_5 	 0.001
373 	 334 	 AA6_pssm_8 	 0.001
374 	 618 	 AA20_pssm_12 	 0.001
375 	 483 	 AA13_pssm_17 	 0.001
376 	 617 	 AA20_pssm_11 	 0.001
377 	 295 	 AA4_pssm_9 	 0.001
378 	 269 	 AA3_pssm_3 	 0.001
379 	 144 	 AA18_Polarity 	 0.001
380 	 9 	 AA_5_sa_1 	 0.001
381 	 577 	 AA18_pssm_11 	 0.001
382 	 520 	 AA15_pssm_14 	 0.001
383 	 164 	 AA1_ss_1 	 0.001
384 	 104 	 AA9_Polarity 	 0.001
385 	 168 	 AA2_ss_2 	 0.001
386 	 341 	 AA6_pssm_15 	 0.001
387 	 599 	 AA19_pssm_13 	 0.001
388 	 565 	 AA17_pssm_19 	 0.001
389 	 512 	 AA15_pssm_6 	 0.001
390 	 74 	 AA3_Polarity 	 0.001
391 	 570 	 AA18_pssm_4 	 0.001
392 	 160 	 AA21_structure 	 0.001
393 	 382 	 AA8_pssm_16 	 0.001
394 	 562 	 AA17_pssm_16 	 0.001
395 	 360 	 AA7_pssm_14 	 0.001
396 	 621 	 AA20_pssm_15 	 0.001
397 	 131 	 AA15_molecular 	 0.001
398 	 76 	 AA3_molecular 	 0.001
399 	 415 	 AA10_pssm_9 	 0.001
400 	 264 	 AA2_pssm_18 	 0.001
401 	 439 	 AA11_pssm_13 	 0.001
402 	 291 	 AA4_pssm_5 	 0.001
403 	 579 	 AA18_pssm_13 	 0.001
404 	 539 	 AA16_pssm_13 	 0.001
405 	 588 	 AA19_pssm_2 	 0.001
406 	 133 	 AA15_electrostatic 	 0.001
407 	 114 	 AA12_Polarity 	 0.001
408 	 610 	 AA20_pssm_4 	 0.001
409 	 558 	 AA17_pssm_12 	 0.001
410 	 383 	 AA8_pssm_17 	 0.001
411 	 525 	 AA15_pssm_19 	 0.001
412 	 399 	 AA9_pssm_13 	 0.001
413 	 450 	 AA12_pssm_4 	 0.001
414 	 337 	 AA6_pssm_11 	 0.001
415 	 554 	 AA17_pssm_8 	 0.001
416 	 582 	 AA18_pssm_16 	 0.001
417 	 586 	 AA18_pssm_20 	 0.001
418 	 379 	 AA8_pssm_13 	 0.001
419 	 175 	 AA4_ss_3 	 0.001
420 	 112 	 AA10_codon 	 0.001
421 	 370 	 AA8_pssm_4 	 0.001
422 	 187 	 AA8_ss_3 	 0.001
423 	 223 	 AA20_ss_3 	 0.001
424 	 146 	 AA18_molecular 	 0.001
425 	 25 	 AA13_sa_1 	 0.000
426 	 134 	 AA16_Polarity 	 0.000
427 	 522 	 AA15_pssm_16 	 0.000
428 	 176 	 AA5_ss_1 	 0.000
429 	 466 	 AA12_pssm_20 	 0.000
430 	 331 	 AA6_pssm_5 	 0.000
431 	 135 	 AA16_structure 	 0.000
432 	 188 	 AA9_ss_1 	 0.000
433 	 614 	 AA20_pssm_8 	 0.000
434 	 59 	 AA17_disorder 	 0.000
435 	 246 	 AA1_pssm_20 	 0.000
436 	 343 	 AA6_pssm_17 	 0.000
437 	 351 	 AA7_pssm_5 	 0.000
438 	 436 	 AA11_pssm_10 	 0.000
439 	 482 	 AA13_pssm_16 	 0.000
440 	 418 	 AA10_pssm_12 	 0.000
441 	 633 	 AA21_pssm_7 	 0.000
442 	 598 	 AA19_pssm_12 	 0.000
443 	 504 	 AA14_pssm_18 	 0.000
444 	 121 	 AA13_molecular 	 0.000
445 	 465 	 AA12_pssm_19 	 0.000
446 	 26 	 AA13_sa_2 	 0.000
447 	 32 	 AA16_sa_2 	 0.000
448 	 273 	 AA3_pssm_7 	 0.000
449 	 143 	 AA17_electrostatic 	 0.000
450 	 398 	 AA9_pssm_12 	 0.000
451 	 568 	 AA18_pssm_2 	 0.000
452 	 315 	 AA5_pssm_9 	 0.000
453 	 369 	 AA8_pssm_3 	 0.000
454 	 414 	 AA10_pssm_8 	 0.000
455 	 148 	 AA18_electrostatic 	 0.000
456 	 330 	 AA6_pssm_4 	 0.000
457 	 250 	 AA2_pssm_4 	 0.000
458 	 310 	 AA5_pssm_4 	 0.000
459 	 417 	 AA10_pssm_11 	 0.000
460 	 280 	 AA3_pssm_14 	 0.000
461 	 98 	 AA7_electrostatic 	 0.000
462 	 543 	 AA16_pssm_17 	 0.000
463 	 563 	 AA17_pssm_17 	 0.000
464 	 345 	 AA6_pssm_19 	 0.000
465 	 167 	 AA2_ss_1 	 0.000
466 	 240 	 AA1_pssm_14 	 0.000
467 	 266 	 AA2_pssm_20 	 0.000
468 	 317 	 AA5_pssm_11 	 0.000
469 	 12 	 AA6_sa_2 	 0.000
470 	 564 	 AA17_pssm_18 	 0.000
471 	 545 	 AA16_pssm_19 	 0.000
472 	 247 	 AA2_pssm_1 	 0.000
473 	 36 	 AA18_sa_2 	 0.000
474 	 538 	 AA16_pssm_12 	 0.000
475 	 174 	 AA4_ss_2 	 0.000
476 	 119 	 AA13_Polarity 	 0.000
477 	 236 	 AA1_pssm_10 	 0.000
478 	 547 	 AA17_pssm_1 	 0.000
479 	 251 	 AA2_pssm_5 	 0.000
480 	 542 	 AA16_pssm_16 	 0.000
481 	 555 	 AA17_pssm_9 	 0.000
482 	 93 	 AA6_electrostatic 	 0.000
483 	 297 	 AA4_pssm_11 	 0.000
484 	 470 	 AA13_pssm_4 	 0.000
485 	 475 	 AA13_pssm_9 	 0.000
486 	 491 	 AA14_pssm_5 	 0.000
487 	 277 	 AA3_pssm_11 	 0.000
488 	 546 	 AA16_pssm_20 	 0.000
489 	 287 	 AA4_pssm_1 	 0.000
490 	 536 	 AA16_pssm_10 	 0.000
491 	 185 	 AA8_ss_1 	 0.000
492 	 431 	 AA11_pssm_5 	 0.000
493 	 11 	 AA6_sa_1 	 0.000
494 	 169 	 AA2_ss_2 	 0.000
495 	 213 	 AA17_ss_2 	 0.000
496 	 305 	 AA4_pssm_19 	 0.000
497 	 166 	 AA1_ss_3 	 0.000
498 	 384 	 AA8_pssm_18 	 0.000
499 	 17 	 AA9_sa_1 	 0.000
500 	 549 	 AA17_pssm_3 	 0.000
501 	 361 	 AA7_pssm_15 	 0.000
502 	 285 	 AA3_pssm_19 	 0.000
503 	 229 	 AA1_pssm_3 	 0.000
504 	 532 	 AA16_pssm_6 	 0.000
505 	 313 	 AA5_pssm_7 	 0.000
506 	 518 	 AA15_pssm_12 	 0.000
507 	 274 	 AA3_pssm_8 	 0.000
508 	 571 	 AA18_pssm_5 	 0.000
509 	 105 	 AA9_structure 	 0.000
510 	 605 	 AA19_pssm_19 	 0.000
511 	 484 	 AA13_pssm_18 	 0.000
512 	 58 	 AA16_disorder 	 0.000
513 	 206 	 AA15_ss_1 	 0.000
514 	 631 	 AA21_pssm_5 	 0.000
515 	 209 	 AA16_ss_1 	 0.000
516 	 464 	 AA12_pssm_18 	 0.000
517 	 376 	 AA8_pssm_10 	 0.000
518 	 252 	 AA2_pssm_6 	 0.000
519 	 257 	 AA2_pssm_11 	 0.000
520 	 18 	 AA9_sa_2 	 0.000
521 	 569 	 AA18_pssm_3 	 0.000
522 	 393 	 AA9_pssm_7 	 0.000
523 	 644 	 AA21_pssm_18 	 0.000
524 	 553 	 AA17_pssm_7 	 0.000
525 	 426 	 AA10_pssm_20 	 0.000
526 	 521 	 AA15_pssm_15 	 0.000
527 	 57 	 AA15_disorder 	 0.000
528 	 78 	 AA3_electrostatic 	 0.000
529 	 299 	 AA4_pssm_13 	 0.000
530 	 243 	 AA1_pssm_17 	 0.000
531 	 533 	 AA16_pssm_7 	 0.000
532 	 289 	 AA4_pssm_3 	 0.000
533 	 173 	 AA4_ss_1 	 0.000
534 	 552 	 AA17_pssm_6 	 0.000
535 	 271 	 AA3_pssm_5 	 0.000
536 	 580 	 AA18_pssm_14 	 0.000
537 	 472 	 AA13_pssm_6 	 0.000
538 	 531 	 AA16_pssm_5 	 0.000
539 	 226 	 AA21_ss_3 	 0.000
540 	 335 	 AA6_pssm_9 	 0.000
541 	 202 	 AA13_ss_3 	 0.000
542 	 171 	 AA3_ss_2 	 0.000
543 	 338 	 AA6_pssm_12 	 0.000
544 	 508 	 AA15_pssm_2 	 0.000
545 	 444 	 AA11_pssm_18 	 0.000
546 	 64 	 AA1_Polarity 	 0.000
547 	 437 	 AA11_pssm_11 	 0.000
548 	 385 	 AA8_pssm_19 	 0.000
549 	 556 	 AA17_pssm_10 	 0.000
550 	 634 	 AA21_pssm_8 	 0.000
551 	 509 	 AA15_pssm_3 	 0.000
552 	 481 	 AA13_pssm_15 	 0.000
553 	 300 	 AA4_pssm_14 	 0.000
554 	 319 	 AA5_pssm_13 	 0.000
555 	 480 	 AA13_pssm_14 	 0.000
556 	 440 	 AA11_pssm_14 	 0.000
557 	 454 	 AA12_pssm_8 	 0.000
558 	 312 	 AA5_pssm_6 	 0.000
559 	 238 	 AA1_pssm_12 	 0.000
560 	 576 	 AA18_pssm_10 	 0.000
561 	 230 	 AA1_pssm_4 	 0.000
562 	 528 	 AA16_pssm_2 	 0.000
563 	 284 	 AA3_pssm_18 	 0.000
564 	 253 	 AA2_pssm_7 	 0.000
565 	 488 	 AA14_pssm_2 	 0.000
566 	 161 	 AA21_molecular 	 0.000
567 	 91 	 AA6_molecular 	 0.000
568 	 316 	 AA5_pssm_10 	 0.000
569 	 270 	 AA3_pssm_4 	 0.000
570 	 511 	 AA15_pssm_5 	 0.000
571 	 434 	 AA11_pssm_8 	 0.000
572 	 210 	 AA16_ss_2 	 0.000
573 	 216 	 AA18_ss_2 	 0.000
574 	 165 	 AA1_ss_2 	 0.000
575 	 199 	 AA12_ss_3 	 0.000
576 	 425 	 AA10_pssm_19 	 0.000
577 	 455 	 AA12_pssm_9 	 0.000
578 	 402 	 AA9_pssm_16 	 0.000
579 	 435 	 AA11_pssm_9 	 0.000
580 	 500 	 AA14_pssm_14 	 0.000
581 	 340 	 AA6_pssm_14 	 0.000
582 	 420 	 AA10_pssm_14 	 0.000
583 	 499 	 AA14_pssm_13 	 0.000
584 	 339 	 AA6_pssm_13 	 0.000
585 	 237 	 AA1_pssm_11 	 0.000
586 	 581 	 AA18_pssm_15 	 0.000
587 	 212 	 AA17_ss_1 	 0.000
588 	 537 	 AA16_pssm_11 	 0.000
589 	 258 	 AA2_pssm_12 	 0.000
590 	 288 	 AA4_pssm_2 	 0.000
591 	 517 	 AA15_pssm_11 	 0.000
592 	 641 	 AA21_pssm_15 	 0.000
593 	 514 	 AA15_pssm_8 	 0.000
594 	 276 	 AA3_pssm_10 	 0.000
595 	 4 	 AA2_sa_2 	 0.000
596 	 471 	 AA13_pssm_5 	 0.000
597 	 424 	 AA10_pssm_18 	 0.000
598 	 231 	 AA1_pssm_5 	 0.000
599 	 311 	 AA5_pssm_5 	 0.000
600 	 375 	 AA8_pssm_9 	 0.000
601 	 595 	 AA19_pssm_9 	 0.000
602 	 639 	 AA21_pssm_13 	 0.000
603 	 589 	 AA19_pssm_3 	 0.000
604 	 234 	 AA1_pssm_8 	 0.000
605 	 355 	 AA7_pssm_9 	 0.000
606 	 182 	 AA7_ss_1 	 0.000
607 	 409 	 AA10_pssm_3 	 0.000
608 	 503 	 AA14_pssm_17 	 0.000
609 	 322 	 AA5_pssm_16 	 0.000
610 	 259 	 AA2_pssm_13 	 0.000
611 	 394 	 AA9_pssm_8 	 0.000
612 	 400 	 AA9_pssm_14 	 0.000
613 	 265 	 AA2_pssm_19 	 0.000
614 	 179 	 AA6_ss_1 	 0.000
615 	 561 	 AA17_pssm_15 	 0.000
616 	 68 	 AA1_electrostatic 	 0.000
617 	 474 	 AA13_pssm_8 	 0.000
618 	 469 	 AA13_pssm_3 	 0.000
619 	 489 	 AA14_pssm_3 	 0.000
620 	 460 	 AA12_pssm_14 	 0.000
621 	 248 	 AA2_pssm_2 	 0.000
622 	 541 	 AA16_pssm_15 	 0.000
623 	 308 	 AA5_pssm_2 	 0.000
624 	 377 	 AA8_pssm_11 	 0.000
625 	 559 	 AA17_pssm_13 	 0.000
626 	 643 	 AA21_pssm_17 	 0.000
627 	 256 	 AA2_pssm_10 	 0.000
628 	 616 	 AA20_pssm_10 	 0.000
629 	 557 	 AA17_pssm_11 	 0.000
630 	 626 	 AA20_pssm_20 	 0.000
631 	 348 	 AA7_pssm_2 	 0.000
632 	 3 	 AA2_sa_1 	 0.000
633 	 205 	 AA14_ss_3 	 0.000
634 	 645 	 AA21_pssm_19 	 0.000
635 	 416 	 AA10_pssm_10 	 0.000
636 	 463 	 AA12_pssm_17 	 0.000
637 	 263 	 AA2_pssm_17 	 0.000
638 	 154 	 AA20_Polarity 	 0.000
639 	 298 	 AA4_pssm_12 	 0.000
640 	 640 	 AA21_pssm_14 	 0.000
641 	 615 	 AA20_pssm_9 	 0.000
642 	 619 	 AA20_pssm_13 	 0.000
643 	 390 	 AA9_pssm_4 	 0.000
644 	 515 	 AA15_pssm_9 	 -0.000
645 	 349 	 AA7_pssm_3 	 -0.000

*** mRMR features *** 
Order 	 Fea 	 Name 	 Score
1 	 433 	 AA11_pssm_12 	 0.057
2 	 413 	 AA10_pssm_7 	 0.020
3 	 22 	 AA11_sa_2 	 0.018
4 	 41 	 AA21_sa_1 	 0.010
5 	 353 	 AA7_pssm_7 	 0.011
6 	 158 	 AA20_electrostatic 	 0.008
7 	 422 	 AA10_pssm_16 	 0.008
8 	 606 	 AA19_pssm_20 	 0.005
9 	 378 	 AA8_pssm_12 	 0.005
10 	 493 	 AA14_pssm_7 	 0.007
11 	 430 	 AA11_pssm_4 	 0.009
12 	 294 	 AA4_pssm_8 	 0.005
13 	 268 	 AA3_pssm_2 	 0.005
14 	 468 	 AA13_pssm_2 	 0.005
15 	 510 	 AA15_pssm_4 	 0.005
16 	 458 	 AA12_pssm_12 	 0.005
17 	 388 	 AA9_pssm_2 	 0.004
18 	 356 	 AA7_pssm_10 	 0.004
19 	 427 	 AA11_pssm_1 	 0.005
20 	 642 	 AA21_pssm_16 	 0.004
21 	 8 	 AA4_sa_2 	 0.004
22 	 21 	 AA11_sa_1 	 0.006
23 	 573 	 AA18_pssm_7 	 0.004
24 	 314 	 AA5_pssm_8 	 0.004
25 	 495 	 AA14_pssm_9 	 0.004
26 	 529 	 AA16_pssm_3 	 0.003
27 	 65 	 AA1_structure 	 0.003
28 	 113 	 AA10_electrostatic 	 0.004
29 	 275 	 AA3_pssm_9 	 0.003
30 	 13 	 AA7_sa_1 	 0.003
31 	 507 	 AA15_pssm_1 	 0.003
32 	 255 	 AA2_pssm_9 	 0.003
33 	 603 	 AA19_pssm_17 	 0.003
34 	 593 	 AA19_pssm_7 	 0.002
35 	 442 	 AA11_pssm_16 	 0.003
36 	 106 	 AA9_molecular 	 0.003
37 	 635 	 AA21_pssm_9 	 0.002
38 	 89 	 AA6_Polarity 	 0.002
39 	 72 	 AA2_codon 	 0.002
40 	 142 	 AA17_codon 	 0.002
41 	 447 	 AA12_pssm_1 	 0.002
42 	 290 	 AA4_pssm_4 	 0.002
43 	 350 	 AA7_pssm_4 	 0.002
44 	 128 	 AA14_electrostatic 	 0.002
45 	 432 	 AA11_pssm_6 	 0.002
46 	 423 	 AA10_pssm_17 	 0.002
47 	 16 	 AA8_sa_2 	 0.002
48 	 612 	 AA20_pssm_6 	 0.002
49 	 283 	 AA3_pssm_17 	 0.002
50 	 218 	 AA19_ss_1 	 0.002
51 	 397 	 AA9_pssm_11 	 0.002
52 	 628 	 AA21_pssm_2 	 0.002
53 	 487 	 AA14_pssm_1 	 0.001
54 	 368 	 AA8_pssm_2 	 0.001
55 	 97 	 AA7_codon 	 0.001
56 	 412 	 AA10_pssm_6 	 0.001
57 	 411 	 AA10_pssm_5 	 0.001
58 	 262 	 AA2_pssm_16 	 0.001
59 	 27 	 AA14_sa_1 	 0.001
60 	 267 	 AA3_pssm_1 	 0.001
61 	 235 	 AA1_pssm_9 	 0.001
62 	 323 	 AA5_pssm_17 	 0.001
63 	 328 	 AA6_pssm_2 	 0.001
64 	 625 	 AA20_pssm_19 	 0.001
65 	 445 	 AA11_pssm_19 	 0.001
66 	 608 	 AA20_pssm_2 	 0.001
67 	 208 	 AA15_ss_3 	 0.001
68 	 443 	 AA11_pssm_17 	 0.001
69 	 421 	 AA10_pssm_15 	 0.000
70 	 120 	 AA13_structure 	 0.001
71 	 163 	 AA21_electrostatic 	 0.001
72 	 52 	 AA10_disorder 	 0.001
73 	 354 	 AA7_pssm_8 	 0.000
74 	 37 	 AA19_sa_1 	 0.000
75 	 374 	 AA8_pssm_8 	 0.000
76 	 526 	 AA15_pssm_20 	 0.000
77 	 490 	 AA14_pssm_4 	 0.000
78 	 534 	 AA16_pssm_8 	 0.000
79 	 566 	 AA17_pssm_20 	 0.000
80 	 372 	 AA8_pssm_6 	 0.000
81 	 611 	 AA20_pssm_5 	 0.000
82 	 347 	 AA7_pssm_1 	 0.000
83 	 428 	 AA11_pssm_2 	 0.000
84 	 195 	 AA11_ss_2 	 0.000
85 	 82 	 AA4_codon 	 -0.000
86 	 245 	 AA1_pssm_19 	 -0.000
87 	 14 	 AA7_sa_2 	 -0.000
88 	 260 	 AA2_pssm_14 	 -0.000
89 	 449 	 AA12_pssm_3 	 -0.000
90 	 222 	 AA20_ss_2 	 -0.000
91 	 485 	 AA13_pssm_19 	 -0.000
92 	 241 	 AA1_pssm_15 	 -0.000
93 	 303 	 AA4_pssm_17 	 -0.000
94 	 486 	 AA13_pssm_20 	 -0.000
95 	 578 	 AA18_pssm_12 	 -0.000
96 	 86 	 AA5_molecular 	 -0.000
97 	 535 	 AA16_pssm_9 	 -0.000
98 	 550 	 AA17_pssm_4 	 -0.000
99 	 505 	 AA14_pssm_19 	 -0.000
100 	 96 	 AA7_molecular 	 -0.000
101 	 6 	 AA3_sa_2 	 -0.000
102 	 637 	 AA21_pssm_11 	 -0.000
103 	 111 	 AA10_molecular 	 -0.000
104 	 403 	 AA9_pssm_17 	 -0.000
105 	 249 	 AA2_pssm_3 	 -0.000
106 	 613 	 AA20_pssm_7 	 -0.001
107 	 448 	 AA12_pssm_2 	 -0.000
108 	 359 	 AA7_pssm_13 	 -0.000
109 	 575 	 AA18_pssm_9 	 -0.000
110 	 178 	 AA5_ss_3 	 -0.001
111 	 396 	 AA9_pssm_10 	 -0.001
112 	 92 	 AA6_codon 	 -0.001
113 	 523 	 AA15_pssm_17 	 -0.001
114 	 583 	 AA18_pssm_17 	 -0.001
115 	 342 	 AA6_pssm_16 	 -0.001
116 	 519 	 AA15_pssm_13 	 -0.001
117 	 363 	 AA7_pssm_17 	 -0.001
118 	 391 	 AA9_pssm_5 	 -0.001
119 	 95 	 AA7_structure 	 -0.001
120 	 147 	 AA18_codon 	 -0.001
121 	 24 	 AA12_sa_2 	 -0.001
122 	 155 	 AA20_structure 	 -0.001
123 	 239 	 AA1_pssm_13 	 -0.001
124 	 604 	 AA19_pssm_18 	 -0.001
125 	 302 	 AA4_pssm_16 	 -0.001
126 	 381 	 AA8_pssm_15 	 -0.001
127 	 438 	 AA11_pssm_7 	 -0.001
128 	 392 	 AA9_pssm_6 	 -0.001
129 	 609 	 AA20_pssm_3 	 -0.001
130 	 478 	 AA13_pssm_12 	 -0.001
131 	 228 	 AA1_pssm_2 	 -0.001
132 	 591 	 AA19_pssm_5 	 -0.001
133 	 459 	 AA12_pssm_13 	 -0.001
134 	 623 	 AA20_pssm_17 	 -0.001
135 	 326 	 AA5_pssm_20 	 -0.001
136 	 629 	 AA21_pssm_3 	 -0.001
137 	 127 	 AA14_codon 	 -0.001
138 	 301 	 AA4_pssm_15 	 -0.001
139 	 441 	 AA11_pssm_15 	 -0.001
140 	 293 	 AA4_pssm_7 	 -0.001
141 	 530 	 AA16_pssm_4 	 -0.001
142 	 601 	 AA19_pssm_15 	 -0.001
143 	 227 	 AA1_pssm_1 	 -0.001
144 	 324 	 AA5_pssm_18 	 -0.001
145 	 452 	 AA12_pssm_6 	 -0.001
146 	 477 	 AA13_pssm_11 	 -0.001
147 	 77 	 AA3_codon 	 -0.001
148 	 278 	 AA3_pssm_12 	 -0.001
149 	 405 	 AA9_pssm_19 	 -0.001
150 	 197 	 AA12_ss_1 	 -0.001
151 	 562 	 AA17_pssm_16 	 -0.001
152 	 364 	 AA7_pssm_18 	 -0.001
153 	 592 	 AA19_pssm_6 	 -0.001
154 	 367 	 AA8_pssm_1 	 -0.001
155 	 574 	 AA18_pssm_8 	 -0.002
156 	 548 	 AA17_pssm_2 	 -0.002
157 	 321 	 AA5_pssm_15 	 -0.002
158 	 221 	 AA20_ss_1 	 -0.001
159 	 429 	 AA11_pssm_3 	 -0.002
160 	 28 	 AA14_sa_2 	 -0.002
161 	 344 	 AA6_pssm_18 	 -0.002
162 	 594 	 AA19_pssm_8 	 -0.002
163 	 332 	 AA6_pssm_6 	 -0.002
164 	 254 	 AA2_pssm_8 	 -0.002
165 	 410 	 AA10_pssm_4 	 -0.002
166 	 451 	 AA12_pssm_5 	 -0.002
167 	 343 	 AA6_pssm_17 	 -0.002
168 	 483 	 AA13_pssm_17 	 -0.002
169 	 621 	 AA20_pssm_15 	 -0.002
170 	 579 	 AA18_pssm_13 	 -0.002
171 	 366 	 AA7_pssm_20 	 -0.002
172 	 99 	 AA8_Polarity 	 -0.002
173 	 7 	 AA4_sa_1 	 -0.002
174 	 269 	 AA3_pssm_3 	 -0.002
175 	 125 	 AA14_structure 	 -0.002
176 	 371 	 AA8_pssm_5 	 -0.002
177 	 40 	 AA20_sa_2 	 -0.002
178 	 415 	 AA10_pssm_9 	 -0.002
179 	 336 	 AA6_pssm_10 	 -0.002
180 	 632 	 AA21_pssm_6 	 -0.002
181 	 362 	 AA7_pssm_16 	 -0.002
182 	 132 	 AA15_codon 	 -0.002
183 	 407 	 AA10_pssm_1 	 -0.002
184 	 243 	 AA1_pssm_17 	 -0.002
185 	 258 	 AA2_pssm_12 	 -0.002
186 	 304 	 AA4_pssm_18 	 -0.002
187 	 159 	 AA21_Polarity 	 -0.002
188 	 137 	 AA16_codon 	 -0.002
189 	 383 	 AA8_pssm_17 	 -0.002
190 	 246 	 AA1_pssm_20 	 -0.002
191 	 152 	 AA19_codon 	 -0.002
192 	 192 	 AA10_ss_2 	 -0.002
193 	 156 	 AA20_molecular 	 -0.002
194 	 47 	 AA5_disorder 	 -0.002
195 	 572 	 AA18_pssm_6 	 -0.002
196 	 309 	 AA5_pssm_3 	 -0.002
197 	 29 	 AA15_sa_1 	 -0.002
198 	 123 	 AA13_electrostatic 	 -0.002
199 	 279 	 AA3_pssm_13 	 -0.002
200 	 554 	 AA17_pssm_8 	 -0.002
201 	 453 	 AA12_pssm_7 	 -0.002
202 	 266 	 AA2_pssm_20 	 -0.002
203 	 569 	 AA18_pssm_3 	 -0.002
204 	 431 	 AA11_pssm_5 	 -0.002
205 	 406 	 AA9_pssm_20 	 -0.002
206 	 296 	 AA4_pssm_10 	 -0.002
207 	 401 	 AA9_pssm_15 	 -0.002
208 	 380 	 AA8_pssm_14 	 -0.002
209 	 595 	 AA19_pssm_9 	 -0.002
210 	 524 	 AA15_pssm_18 	 -0.002
211 	 274 	 AA3_pssm_8 	 -0.002
212 	 543 	 AA16_pssm_17 	 -0.002
213 	 232 	 AA1_pssm_6 	 -0.002
214 	 515 	 AA15_pssm_9 	 -0.002
215 	 563 	 AA17_pssm_17 	 -0.002
216 	 15 	 AA8_sa_1 	 -0.002
217 	 295 	 AA4_pssm_9 	 -0.002
218 	 501 	 AA14_pssm_15 	 -0.002
219 	 539 	 AA16_pssm_13 	 -0.002
220 	 528 	 AA16_pssm_2 	 -0.002
221 	 339 	 AA6_pssm_13 	 -0.002
222 	 229 	 AA1_pssm_3 	 -0.002
223 	 389 	 AA9_pssm_3 	 -0.002
224 	 42 	 AA21_sa_2 	 -0.002
225 	 116 	 AA12_molecular 	 -0.002
226 	 272 	 AA3_pssm_6 	 -0.002
227 	 588 	 AA19_pssm_2 	 -0.002
228 	 555 	 AA17_pssm_9 	 -0.002
229 	 627 	 AA21_pssm_1 	 -0.002
230 	 444 	 AA11_pssm_18 	 -0.002
231 	 473 	 AA13_pssm_7 	 -0.002
232 	 408 	 AA10_pssm_2 	 -0.002
233 	 334 	 AA6_pssm_8 	 -0.002
234 	 492 	 AA14_pssm_6 	 -0.002
235 	 584 	 AA18_pssm_18 	 -0.002
236 	 465 	 AA12_pssm_19 	 -0.002
237 	 341 	 AA6_pssm_15 	 -0.002
238 	 404 	 AA9_pssm_18 	 -0.002
239 	 244 	 AA1_pssm_18 	 -0.002
240 	 80 	 AA4_structure 	 -0.002
241 	 358 	 AA7_pssm_12 	 -0.002
242 	 494 	 AA14_pssm_8 	 -0.002
243 	 419 	 AA10_pssm_13 	 -0.002
244 	 439 	 AA11_pssm_13 	 -0.002
245 	 620 	 AA20_pssm_14 	 -0.002
246 	 286 	 AA3_pssm_20 	 -0.002
247 	 355 	 AA7_pssm_9 	 -0.002
248 	 549 	 AA17_pssm_3 	 -0.002
249 	 184 	 AA7_ss_3 	 -0.002
250 	 454 	 AA12_pssm_8 	 -0.002
251 	 259 	 AA2_pssm_13 	 -0.002
252 	 322 	 AA5_pssm_16 	 -0.002
253 	 242 	 AA1_pssm_16 	 -0.002
254 	 596 	 AA19_pssm_10 	 -0.002
255 	 291 	 AA4_pssm_5 	 -0.002
256 	 395 	 AA9_pssm_9 	 -0.002
257 	 559 	 AA17_pssm_13 	 -0.002
258 	 318 	 AA5_pssm_12 	 -0.002
259 	 375 	 AA8_pssm_9 	 -0.002
260 	 409 	 AA10_pssm_3 	 -0.002
261 	 446 	 AA11_pssm_20 	 -0.002
262 	 479 	 AA13_pssm_13 	 -0.002
263 	 463 	 AA12_pssm_17 	 -0.002
264 	 600 	 AA19_pssm_14 	 -0.002
265 	 252 	 AA2_pssm_6 	 -0.002
266 	 503 	 AA14_pssm_17 	 -0.002
267 	 103 	 AA8_electrostatic 	 -0.002
268 	 475 	 AA13_pssm_9 	 -0.002
269 	 570 	 AA18_pssm_4 	 -0.002
270 	 281 	 AA3_pssm_15 	 -0.002
271 	 136 	 AA16_molecular 	 -0.002
272 	 434 	 AA11_pssm_8 	 -0.002
273 	 435 	 AA11_pssm_9 	 -0.002
274 	 164 	 AA1_ss_1 	 -0.002
275 	 568 	 AA18_pssm_2 	 -0.002
276 	 614 	 AA20_pssm_8 	 -0.002
277 	 513 	 AA15_pssm_7 	 -0.002
278 	 521 	 AA15_pssm_15 	 -0.002
279 	 320 	 AA5_pssm_14 	 -0.002
280 	 63 	 AA21_disorder 	 -0.002
281 	 369 	 AA8_pssm_3 	 -0.002
282 	 590 	 AA19_pssm_4 	 -0.002
283 	 234 	 AA1_pssm_8 	 -0.002
284 	 261 	 AA2_pssm_15 	 -0.002
285 	 558 	 AA17_pssm_12 	 -0.002
286 	 461 	 AA12_pssm_15 	 -0.002
287 	 333 	 AA6_pssm_7 	 -0.003
288 	 527 	 AA16_pssm_1 	 -0.003
289 	 509 	 AA15_pssm_3 	 -0.003
290 	 471 	 AA13_pssm_5 	 -0.003
291 	 634 	 AA21_pssm_8 	 -0.003
292 	 250 	 AA2_pssm_4 	 -0.003
293 	 455 	 AA12_pssm_9 	 -0.003
294 	 577 	 AA18_pssm_11 	 -0.003
295 	 263 	 AA2_pssm_17 	 -0.003
296 	 462 	 AA12_pssm_16 	 -0.003
297 	 402 	 AA9_pssm_16 	 -0.003
298 	 319 	 AA5_pssm_13 	 -0.003
299 	 565 	 AA17_pssm_19 	 -0.003
300 	 425 	 AA10_pssm_19 	 -0.003
301 	 617 	 AA20_pssm_11 	 -0.003
302 	 329 	 AA6_pssm_3 	 -0.003
303 	 351 	 AA7_pssm_5 	 -0.003
304 	 496 	 AA14_pssm_10 	 -0.003
305 	 214 	 AA17_ss_3 	 -0.003
306 	 271 	 AA3_pssm_5 	 -0.003
307 	 51 	 AA9_disorder 	 -0.003
308 	 88 	 AA5_electrostatic 	 -0.003
309 	 639 	 AA21_pssm_13 	 -0.003
310 	 589 	 AA19_pssm_3 	 -0.003
311 	 379 	 AA8_pssm_13 	 -0.003
312 	 331 	 AA6_pssm_5 	 -0.003
313 	 194 	 AA11_ss_1 	 -0.003
314 	 551 	 AA17_pssm_5 	 -0.003
315 	 482 	 AA13_pssm_16 	 -0.003
316 	 1 	 AA1_sa_1 	 -0.003
317 	 108 	 AA9_electrostatic 	 -0.003
318 	 643 	 AA21_pssm_17 	 -0.003
319 	 365 	 AA7_pssm_19 	 -0.003
320 	 352 	 AA7_pssm_6 	 -0.003
321 	 299 	 AA4_pssm_13 	 -0.003
322 	 225 	 AA21_ss_2 	 -0.003
323 	 122 	 AA13_codon 	 -0.003
324 	 538 	 AA16_pssm_12 	 -0.003
325 	 315 	 AA5_pssm_9 	 -0.003
326 	 289 	 AA4_pssm_3 	 -0.003
327 	 140 	 AA17_structure 	 -0.003
328 	 264 	 AA2_pssm_18 	 -0.003
329 	 386 	 AA8_pssm_20 	 -0.003
330 	 172 	 AA3_ss_3 	 -0.003
331 	 544 	 AA16_pssm_18 	 -0.003
332 	 599 	 AA19_pssm_13 	 -0.003
333 	 464 	 AA12_pssm_18 	 -0.003
334 	 586 	 AA18_pssm_20 	 -0.003
335 	 646 	 AA21_pssm_20	 -0.003
336 	 387 	 AA9_pssm_1 	 -0.003
337 	 622 	 AA20_pssm_16 	 -0.003
338 	 508 	 AA15_pssm_2 	 -0.003
339 	 176 	 AA5_ss_1 	 -0.003
340 	 357 	 AA7_pssm_11 	 -0.003
341 	 424 	 AA10_pssm_18 	 -0.003
342 	 384 	 AA8_pssm_18 	 -0.003
343 	 457 	 AA12_pssm_11 	 -0.003
344 	 33 	 AA17_sa_1 	 -0.003
345 	 546 	 AA16_pssm_20 	 -0.003
346 	 346 	 AA6_pssm_20 	 -0.003
347 	 436 	 AA11_pssm_10 	 -0.003
348 	 285 	 AA3_pssm_19 	 -0.003
349 	 190 	 AA9_ss_3 	 -0.003
350 	 5 	 AA3_sa_1 	 -0.003
351 	 472 	 AA13_pssm_6 	 -0.003
352 	 248 	 AA2_pssm_2 	 -0.003
353 	 66 	 AA1_molecular 	 -0.003
354 	 630 	 AA21_pssm_4 	 -0.003
355 	 305 	 AA4_pssm_19 	 -0.003
356 	 567 	 AA18_pssm_1 	 -0.003
357 	 307 	 AA5_pssm_1 	 -0.003
358 	 426 	 AA10_pssm_20 	 -0.003
359 	 310 	 AA5_pssm_4 	 -0.003
360 	 70 	 AA2_structure 	 -0.003
361 	 533 	 AA16_pssm_7 	 -0.003
362 	 335 	 AA6_pssm_9 	 -0.003
363 	 398 	 AA9_pssm_12 	 -0.003
364 	 306 	 AA4_pssm_20 	 -0.003
365 	 610 	 AA20_pssm_4 	 -0.003
366 	 491 	 AA14_pssm_5 	 -0.003
367 	 23 	 AA12_sa_1 	 -0.003
368 	 150 	 AA19_structure 	 -0.003
369 	 349 	 AA7_pssm_3 	 -0.003
370 	 440 	 AA11_pssm_14 	 -0.003
371 	 399 	 AA9_pssm_13 	 -0.003
372 	 516 	 AA15_pssm_10 	 -0.003
373 	 311 	 AA5_pssm_5 	 -0.003
374 	 288 	 AA4_pssm_2 	 -0.003
375 	 327 	 AA6_pssm_1 	 -0.003
376 	 638 	 AA21_pssm_12 	 -0.003
377 	 75 	 AA3_structure 	 -0.003
378 	 585 	 AA18_pssm_19 	 -0.003
379 	 231 	 AA1_pssm_5 	 -0.003
380 	 191 	 AA10_ss_1 	 -0.003
381 	 337 	 AA6_pssm_11 	 -0.003
382 	 481 	 AA13_pssm_15 	 -0.003
383 	 489 	 AA14_pssm_3 	 -0.003
384 	 312 	 AA5_pssm_6 	 -0.003
385 	 619 	 AA20_pssm_13 	 -0.003
386 	 414 	 AA10_pssm_8 	 -0.003
387 	 257 	 AA2_pssm_11 	 -0.003
388 	 418 	 AA10_pssm_12 	 -0.003
389 	 488 	 AA14_pssm_2 	 -0.003
390 	 615 	 AA20_pssm_9 	 -0.003
391 	 251 	 AA2_pssm_5 	 -0.003
392 	 238 	 AA1_pssm_12 	 -0.003
393 	 552 	 AA17_pssm_6 	 -0.003
394 	 476 	 AA13_pssm_10 	 -0.003
395 	 115 	 AA12_structure 	 -0.003
396 	 484 	 AA13_pssm_18 	 -0.003
397 	 38 	 AA19_sa_2 	 -0.003
398 	 345 	 AA6_pssm_19 	 -0.003
399 	 361 	 AA7_pssm_15 	 -0.003
400 	 450 	 AA12_pssm_4 	 -0.003
401 	 624 	 AA20_pssm_18 	 -0.003
402 	 499 	 AA14_pssm_13 	 -0.003
403 	 230 	 AA1_pssm_4 	 -0.003
404 	 474 	 AA13_pssm_8 	 -0.003
405 	 626 	 AA20_pssm_20 	 -0.003
406 	 394 	 AA9_pssm_8 	 -0.003
407 	 393 	 AA9_pssm_7 	 -0.003
408 	 20 	 AA10_sa_2 	 -0.003
409 	 561 	 AA17_pssm_15 	 -0.003
410 	 636 	 AA21_pssm_10 	 -0.003
411 	 469 	 AA13_pssm_3 	 -0.003
412 	 317 	 AA5_pssm_11 	 -0.003
413 	 330 	 AA6_pssm_4 	 -0.003
414 	 170 	 AA3_ss_1 	 -0.003
415 	 325 	 AA5_pssm_19 	 -0.003
416 	 506 	 AA14_pssm_20 	 -0.003
417 	 560 	 AA17_pssm_14 	 -0.003
418 	 370 	 AA8_pssm_4 	 -0.003
419 	 219 	 AA19_ss_2 	 -0.003
420 	 240 	 AA1_pssm_14 	 -0.003
421 	 308 	 AA5_pssm_2 	 -0.004
422 	 338 	 AA6_pssm_12 	 -0.004
423 	 360 	 AA7_pssm_14 	 -0.004
424 	 540 	 AA16_pssm_14 	 -0.004
425 	 79 	 AA4_Polarity 	 -0.004
426 	 518 	 AA15_pssm_12 	 -0.004
427 	 618 	 AA20_pssm_12 	 -0.004
428 	 437 	 AA11_pssm_11 	 -0.004
429 	 456 	 AA12_pssm_10 	 -0.004
430 	 53 	 AA11_disorder 	 -0.004
431 	 284 	 AA3_pssm_18 	 -0.004
432 	 517 	 AA15_pssm_11 	 -0.004
433 	 598 	 AA19_pssm_12 	 -0.004
434 	 237 	 AA1_pssm_11 	 -0.004
435 	 420 	 AA10_pssm_14 	 -0.004
436 	 270 	 AA3_pssm_4 	 -0.004
437 	 203 	 AA14_ss_1 	 -0.004
438 	 504 	 AA14_pssm_18 	 -0.004
439 	 181 	 AA6_ss_3 	 -0.004
440 	 460 	 AA12_pssm_14 	 -0.004
441 	 67 	 AA1_codon 	 -0.004
442 	 597 	 AA19_pssm_11 	 -0.004
443 	 298 	 AA4_pssm_12 	 -0.004
444 	 470 	 AA13_pssm_4 	 -0.004
445 	 525 	 AA15_pssm_19 	 -0.004
446 	 502 	 AA14_pssm_16 	 -0.004
447 	 224 	 AA21_ss_1 	 -0.004
448 	 537 	 AA16_pssm_11 	 -0.004
449 	 373 	 AA8_pssm_7 	 -0.004
450 	 581 	 AA18_pssm_15 	 -0.004
451 	 256 	 AA2_pssm_10 	 -0.004
452 	 300 	 AA4_pssm_14 	 -0.004
453 	 400 	 AA9_pssm_14 	 -0.004
454 	 340 	 AA6_pssm_14 	 -0.004
455 	 265 	 AA2_pssm_19 	 -0.004
456 	 557 	 AA17_pssm_11 	 -0.004
457 	 166 	 AA1_ss_3 	 -0.004
458 	 514 	 AA15_pssm_8 	 -0.004
459 	 217 	 AA18_ss_3 	 -0.004
460 	 280 	 AA3_pssm_14 	 -0.004
461 	 196 	 AA11_ss_3 	 -0.004
462 	 385 	 AA8_pssm_19 	 -0.004
463 	 417 	 AA10_pssm_11 	 -0.004
464 	 151 	 AA19_molecular 	 -0.004
465 	 541 	 AA16_pssm_15 	 -0.004
466 	 576 	 AA18_pssm_10 	 -0.004
467 	 480 	 AA13_pssm_14 	 -0.004
468 	 348 	 AA7_pssm_2 	 -0.004
469 	 253 	 AA2_pssm_7 	 -0.004
470 	 157 	 AA20_codon 	 -0.004
471 	 511 	 AA15_pssm_5 	 -0.004
472 	 553 	 AA17_pssm_7 	 -0.004
473 	 236 	 AA1_pssm_10 	 -0.004
474 	 109 	 AA10_Polarity 	 -0.004
475 	 292 	 AA4_pssm_6 	 -0.004
476 	 141 	 AA17_molecular 	 -0.004
477 	 377 	 AA8_pssm_11 	 -0.004
478 	 189 	 AA9_ss_2 	 -0.004
479 	 102 	 AA8_codon 	 -0.004
480 	 497 	 AA14_pssm_11 	 -0.004
481 	 297 	 AA4_pssm_11 	 -0.004
482 	 545 	 AA16_pssm_19 	 -0.004
483 	 313 	 AA5_pssm_7 	 -0.004
484 	 467 	 AA13_pssm_1 	 -0.004
485 	 536 	 AA16_pssm_10 	 -0.004
486 	 277 	 AA3_pssm_11 	 -0.004
487 	 531 	 AA16_pssm_5 	 -0.004
488 	 233 	 AA1_pssm_7 	 -0.004
489 	 35 	 AA18_sa_1 	 -0.004
490 	 247 	 AA2_pssm_1 	 -0.004
491 	 633 	 AA21_pssm_7 	 -0.004
492 	 466 	 AA12_pssm_20 	 -0.004
493 	 644 	 AA21_pssm_18 	 -0.004
494 	 168 	 AA2_ss_2 	 -0.004
495 	 101 	 AA8_molecular 	 -0.004
496 	 520 	 AA15_pssm_14 	 -0.004
497 	 146 	 AA18_molecular 	 -0.004
498 	 273 	 AA3_pssm_7 	 -0.004
499 	 602 	 AA19_pssm_16 	 -0.004
500 	 564 	 AA17_pssm_18 	 -0.005
501 	 71 	 AA2_molecular 	 -0.005
502 	 226 	 AA21_ss_3 	 -0.005
503 	 211 	 AA16_ss_3 	 -0.005
504 	 81 	 AA4_molecular 	 -0.005
505 	 30 	 AA15_sa_2 	 -0.005
506 	 390 	 AA9_pssm_4 	 -0.005
507 	 498 	 AA14_pssm_12 	 -0.005
508 	 117 	 AA12_codon 	 -0.005
509 	 130 	 AA15_structure 	 -0.005
510 	 556 	 AA17_pssm_10 	 -0.005
511 	 31 	 AA16_sa_1 	 -0.005
512 	 126 	 AA14_molecular 	 -0.005
513 	 605 	 AA19_pssm_19 	 -0.005
514 	 215 	 AA18_ss_1 	 -0.005
515 	 316 	 AA5_pssm_10 	 -0.005
516 	 3 	 AA2_sa_1 	 -0.005
517 	 607 	 AA20_pssm_1 	 -0.005
518 	 179 	 AA6_ss_1 	 -0.005
519 	 175 	 AA4_ss_3 	 -0.005
520 	 542 	 AA16_pssm_16 	 -0.005
521 	 641 	 AA21_pssm_15 	 -0.005
522 	 26 	 AA13_sa_2 	 -0.005
523 	 587 	 AA19_pssm_1 	 -0.005
524 	 645 	 AA21_pssm_19 	 -0.005
525 	 200 	 AA13_ss_1 	 -0.005
526 	 167 	 AA2_ss_1 	 -0.005
527 	 582 	 AA18_pssm_16 	 -0.005
528 	 376 	 AA8_pssm_10 	 -0.005
529 	 631 	 AA21_pssm_5 	 -0.005
530 	 107 	 AA9_codon 	 -0.005
531 	 500 	 AA14_pssm_14 	 -0.005
532 	 138 	 AA16_electrostatic 	 -0.005
533 	 276 	 AA3_pssm_10 	 -0.005
534 	 90 	 AA6_structure 	 -0.005
535 	 145 	 AA18_structure 	 -0.005
536 	 416 	 AA10_pssm_10 	 -0.005
537 	 131 	 AA15_molecular 	 -0.005
538 	 87 	 AA5_codon 	 -0.005
539 	 616 	 AA20_pssm_10 	 -0.005
540 	 162 	 AA21_codon 	 -0.005
541 	 571 	 AA18_pssm_5 	 -0.005
542 	 19 	 AA10_sa_1 	 -0.005
543 	 76 	 AA3_molecular 	 -0.005
544 	 69 	 AA2_Polarity 	 -0.005
545 	 12 	 AA6_sa_2 	 -0.005
546 	 183 	 AA7_ss_2 	 -0.005
547 	 202 	 AA13_ss_3 	 -0.005
548 	 220 	 AA19_ss_3 	 -0.005
549 	 10 	 AA_5_sa_2 	 -0.005
550 	 91 	 AA6_molecular 	 -0.006
551 	 193 	 AA10_ss_3 	 -0.006
552 	 2 	 AA1_sa_2 	 -0.006
553 	 118 	 AA12_electrostatic 	 -0.006
554 	 580 	 AA18_pssm_14 	 -0.006
555 	 50 	 AA8_disorder 	 -0.006
556 	 139 	 AA17_Polarity 	 -0.006
557 	 100 	 AA8_structure 	 -0.006
558 	 39 	 AA20_sa_1 	 -0.006
559 	 185 	 AA8_ss_1 	 -0.006
560 	 153 	 AA19_electrostatic 	 -0.006
561 	 640 	 AA21_pssm_14 	 -0.006
562 	 212 	 AA17_ss_1 	 -0.006
563 	 121 	 AA13_molecular 	 -0.006
564 	 173 	 AA4_ss_1 	 -0.006
565 	 129 	 AA15_Polarity 	 -0.006
566 	 112 	 AA10_codon 	 -0.006
567 	 287 	 AA4_pssm_1 	 -0.006
568 	 532 	 AA16_pssm_6 	 -0.006
569 	 43 	 AA1_disorder 	 -0.006
570 	 94 	 AA7_Polarity 	 -0.006
571 	 83 	 AA4_electrostatic 	 -0.006
572 	 206 	 AA15_ss_1 	 -0.006
573 	 73 	 AA2_electrostatic 	 -0.006
574 	 282 	 AA3_pssm_16 	 -0.006
575 	 135 	 AA16_structure 	 -0.006
576 	 85 	 AA5_structure 	 -0.006
577 	 223 	 AA20_ss_3 	 -0.006
578 	 205 	 AA14_ss_3 	 -0.006
579 	 547 	 AA17_pssm_1 	 -0.006
580 	 34 	 AA17_sa_2 	 -0.006
581 	 169 	 AA2_ss_2 	 -0.006
582 	 188 	 AA9_ss_1 	 -0.007
583 	 160 	 AA21_structure 	 -0.007
584 	 105 	 AA9_structure 	 -0.007
585 	 133 	 AA15_electrostatic 	 -0.007
586 	 199 	 AA12_ss_3 	 -0.007
587 	 110 	 AA10_structure 	 -0.007
588 	 4 	 AA2_sa_2 	 -0.007
589 	 148 	 AA18_electrostatic 	 -0.007
590 	 161 	 AA21_molecular 	 -0.007
591 	 25 	 AA13_sa_1 	 -0.007
592 	 32 	 AA16_sa_2 	 -0.007
593 	 78 	 AA3_electrostatic 	 -0.007
594 	 93 	 AA6_electrostatic 	 -0.007
595 	 165 	 AA1_ss_2 	 -0.007
596 	 62 	 AA20_disorder 	 -0.007
597 	 382 	 AA8_pssm_16 	 -0.007
598 	 522 	 AA15_pssm_16 	 -0.007
599 	 18 	 AA9_sa_2 	 -0.007
600 	 84 	 AA5_Polarity 	 -0.007
601 	 182 	 AA7_ss_1 	 -0.007
602 	 149 	 AA19_Polarity 	 -0.007
603 	 143 	 AA17_electrostatic 	 -0.007
604 	 209 	 AA16_ss_1 	 -0.007
605 	 98 	 AA7_electrostatic 	 -0.007
606 	 11 	 AA6_sa_1 	 -0.007
607 	 45 	 AA3_disorder 	 -0.007
608 	 187 	 AA8_ss_3 	 -0.007
609 	 68 	 AA1_electrostatic 	 -0.007
610 	 104 	 AA9_Polarity 	 -0.007
611 	 9 	 AA_5_sa_1 	 -0.007
612 	 36 	 AA18_sa_2 	 -0.007
613 	 119 	 AA13_Polarity 	 -0.008
614 	 114 	 AA12_Polarity 	 -0.008
615 	 207 	 AA15_ss_2 	 -0.008
616 	 55 	 AA13_disorder 	 -0.008
617 	 180 	 AA6_ss_2 	 -0.008
618 	 512 	 AA15_pssm_6 	 -0.008
619 	 124 	 AA14_Polarity 	 -0.008
620 	 154 	 AA20_Polarity 	 -0.009
621 	 134 	 AA16_Polarity 	 -0.009
622 	 198 	 AA12_ss_2 	 -0.009
623 	 64 	 AA1_Polarity 	 -0.009
624 	 177 	 AA5_ss_2 	 -0.009
625 	 74 	 AA3_Polarity 	 -0.009
626 	 17 	 AA9_sa_1 	 -0.009
627 	 144 	 AA18_Polarity 	 -0.009
628 	 48 	 AA6_disorder 	 -0.009
629 	 213 	 AA17_ss_2 	 -0.009
630 	 171 	 AA3_ss_2 	 -0.010
631 	 61 	 AA19_disorder 	 -0.010
632 	 216 	 AA18_ss_2 	 -0.010
633 	 44 	 AA2_disorder 	 -0.010
634 	 54 	 AA12_disorder 	 -0.011
635 	 210 	 AA16_ss_2 	 -0.011
636 	 186 	 AA8_ss_2 	 -0.011
637 	 204 	 AA14_ss_2 	 -0.011
638 	 46 	 AA4_disorder 	 -0.011
639 	 174 	 AA4_ss_2 	 -0.012
640 	 56 	 AA14_disorder 	 -0.012
641 	 201 	 AA13_ss_2 	 -0.012
642 	 60 	 AA18_disorder 	 -0.013
643 	 49 	 AA7_disorder 	 -0.014
644 	 59 	 AA17_disorder 	 -0.016
645 	 58 	 AA16_disorder 	 -0.018
646 	 57 	 AA15_disorder 	 -0.019
