# Supplementary material for: Position-Specific Analysis and Prediction of Protein Pupylation Sites Based on Multiple Features
Source: Biomed Res Int. 2013 Aug 26;2013:109549. doi: 10.1155/2013/109549 (PMC3770009; doi:10.1155/2013/109549)
Supplement: Supplementary file 3 [file 109549.f3.xls]

## Sheet: Sheet1
Number of features	ACC	Sn	Sp	MCC
1	0.6011	0.3607	0.7213	0.0838
2	0.5993	0.3989	0.6995	0.0984
3	0.6393	0.4372	0.7404	0.1797
4	0.632	0.388	0.7404	0.1318
5	0.6667	0.4863	0.7568	0.2449
6	0.6485	0.4809	0.7322	0.2123
7	0.6521	0.4809	0.7377	0.2183
8	0.6995	0.5246	0.7869	0.3156
9	0.6958	0.5137	0.7869	0.3055
10	0.6794	0.4918	0.7732	0.2689
11	0.6958	0.541	0.7732	0.3146
12	0.6812	0.5191	0.7623	0.2818
13	0.6849	0.5027	0.776	0.2824
14	0.6958	0.5027	0.7923	0.3019
15	0.694	0.5191	0.7814	0.304
16	0.6958	0.5082	0.7896	0.3036
17	0.6758	0.4863	0.7705	0.2606
18	0.6812	0.4809	0.7814	0.2683
19	0.6794	0.4863	0.776	0.267
20	0.6721	0.4809	0.7678	0.2523
21	0.6867	0.5246	0.7678	0.2932
22	0.6922	0.5246	0.776	0.3027
23	0.6794	0.4863	0.776	0.267
24	0.6867	0.4754	0.7923	0.2763
25	0.6831	0.4699	0.7896	0.2678
26	0.6758	0.4699	0.7787	0.2548
27	0.6831	0.4973	0.776	0.2772
28	0.7049	0.5246	0.7951	0.3254
29	0.7013	0.5191	0.7923	0.3171
30	0.6831	0.4973	0.776	0.2772
31	0.6594	0.4536	0.7623	0.2201
32	0.6776	0.4863	0.7732	0.2638
33	0.6758	0.4809	0.7732	0.2587
34	0.6885	0.4918	0.7869	0.2851
35	0.6812	0.4809	0.7814	0.2683
36	0.674	0.4645	0.7787	0.2496
37	0.6685	0.4426	0.7814	0.232
38	0.6612	0.4317	0.776	0.215
39	0.6703	0.4645	0.7732	0.2432
40	0.6812	0.4809	0.7814	0.2683
41	0.674	0.459	0.7814	0.2476
42	0.6794	0.4754	0.7814	0.2632
43	0.6758	0.459	0.7842	0.2509
44	0.6576	0.4372	0.7678	0.2107
45	0.663	0.4372	0.776	0.2203
46	0.674	0.4426	0.7896	0.2418
47	0.6794	0.4645	0.7869	0.2593
48	0.6922	0.4863	0.7951	0.2898
49	0.6812	0.4863	0.7787	0.2702
50	0.694	0.5464	0.7678	0.3134
51	0.6922	0.5137	0.7814	0.299
52	0.6995	0.5246	0.7869	0.3156
53	0.7104	0.5191	0.806	0.3337
54	0.7031	0.5082	0.8005	0.3169
55	0.7067	0.5137	0.8033	0.3253
56	0.7086	0.5301	0.7978	0.3338
57	0.6976	0.5246	0.7842	0.3123
58	0.694	0.5464	0.7678	0.3134
59	0.6903	0.5027	0.7842	0.292
60	0.6867	0.5027	0.7787	0.2856
61	0.6758	0.4863	0.7705	0.2606
62	0.6667	0.4863	0.7568	0.2449
63	0.6685	0.4754	0.765	0.244
64	0.6576	0.4372	0.7678	0.2107
65	0.6576	0.4426	0.765	0.2128
66	0.674	0.459	0.7814	0.2476
67	0.6849	0.4918	0.7814	0.2786
68	0.694	0.4863	0.7978	0.2932
69	0.7013	0.4973	0.8033	0.3101
70	0.7031	0.5082	0.8005	0.3169
71	0.6995	0.4973	0.8005	0.3067
72	0.7013	0.4973	0.8033	0.3101
73	0.694	0.4536	0.8142	0.2827
74	0.6903	0.4645	0.8033	0.2793
75	0.6831	0.459	0.7951	0.2641
76	0.6849	0.4754	0.7869	0.273
77	0.6794	0.4918	0.7732	0.2689
78	0.6831	0.4809	0.7842	0.2716
79	0.6758	0.4809	0.7732	0.2587
80	0.6721	0.459	0.7787	0.2444
81	0.6721	0.4536	0.7814	0.2424
82	0.6594	0.4426	0.7678	0.2159
83	0.6721	0.459	0.7787	0.2444
84	0.6922	0.4863	0.7951	0.2898
85	0.6958	0.4699	0.8087	0.2913
86	0.694	0.4809	0.8005	0.2914
87	0.6849	0.4645	0.7951	0.2693
88	0.6831	0.4481	0.8005	0.2604
89	0.6812	0.4426	0.8005	0.2552
90	0.6776	0.4645	0.7842	0.2561
91	0.6685	0.4481	0.7787	0.234
92	0.6612	0.4426	0.7705	0.2191
93	0.6685	0.4645	0.7705	0.24
94	0.674	0.4645	0.7787	0.2496
95	0.6903	0.4863	0.7923	0.2865
96	0.6867	0.4699	0.7951	0.2744
97	0.6885	0.459	0.8033	0.2742
98	0.6831	0.4536	0.7978	0.2622
99	0.6885	0.4699	0.7978	0.2778
100	0.694	0.4973	0.7923	0.2968
101	0.6995	0.4973	0.8005	0.3067
102	0.6885	0.4973	0.7842	0.2869
103	0.6885	0.4863	0.7896	0.2832
104	0.7013	0.4973	0.8033	0.3101
105	0.6958	0.5027	0.7923	0.3019
106	0.6903	0.4754	0.7978	0.2829
107	0.6831	0.4699	0.7896	0.2678
108	0.6867	0.4918	0.7842	0.2818
109	0.6922	0.4863	0.7951	0.2898
110	0.7067	0.5191	0.8005	0.327
111	0.7013	0.5137	0.7951	0.3153
112	0.6995	0.5246	0.7869	0.3156
113	0.7086	0.541	0.7923	0.3372
114	0.7086	0.5355	0.7951	0.3355
115	0.7031	0.5301	0.7869	0.3239
116	0.6976	0.5246	0.7842	0.3123
117	0.6958	0.5246	0.7814	0.3091
118	0.6976	0.5246	0.7842	0.3123
119	0.7031	0.541	0.7842	0.3274
120	0.6903	0.5301	0.7705	0.3014
121	0.6903	0.5082	0.7814	0.2939
122	0.6867	0.4973	0.7814	0.2837
123	0.6867	0.4973	0.7814	0.2837
124	0.6831	0.4863	0.7814	0.2734
125	0.6794	0.4699	0.7842	0.2613
126	0.6849	0.4973	0.7787	0.2805
127	0.6794	0.4918	0.7732	0.2689
128	0.6849	0.5082	0.7732	0.2843
129	0.6812	0.5246	0.7596	0.2838
130	0.674	0.4918	0.765	0.2594
131	0.6776	0.5027	0.765	0.2697
132	0.6721	0.4973	0.7596	0.2583
133	0.6703	0.5027	0.7541	0.2572
134	0.6758	0.4973	0.765	0.2645
135	0.6849	0.5301	0.7623	0.292
136	0.6794	0.5246	0.7568	0.2807
137	0.6758	0.5355	0.7459	0.2785
138	0.6758	0.5355	0.7459	0.2785
139	0.674	0.5355	0.7432	0.2755
140	0.674	0.5355	0.7432	0.2755
141	0.6776	0.5301	0.7514	0.2796
142	0.6703	0.5191	0.7459	0.2633
143	0.674	0.5301	0.7459	0.2735
144	0.6703	0.5246	0.7432	0.2653
145	0.6685	0.5301	0.7377	0.2644
146	0.6667	0.5082	0.7459	0.2531
147	0.663	0.4918	0.7486	0.2408
148	0.663	0.4918	0.7486	0.2408
149	0.6557	0.4918	0.7377	0.2286
150	0.6576	0.4918	0.7404	0.2316
151	0.6612	0.4918	0.7459	0.2377
152	0.6703	0.5027	0.7541	0.2572
153	0.674	0.5191	0.7514	0.2694
154	0.6648	0.5137	0.7404	0.2521
155	0.6612	0.5082	0.7377	0.244
156	0.6612	0.5027	0.7404	0.2419
157	0.6648	0.5137	0.7404	0.2521
158	0.6703	0.5137	0.7486	0.2612
159	0.6685	0.5082	0.7486	0.2561
160	0.6648	0.5027	0.7459	0.248
161	0.6648	0.5082	0.7432	0.25
162	0.6648	0.5082	0.7432	0.25
163	0.6685	0.5137	0.7459	0.2582
164	0.6612	0.5027	0.7404	0.2419
165	0.6594	0.5137	0.7322	0.2431
166	0.6539	0.5082	0.7268	0.232
167	0.6594	0.5082	0.735	0.241
168	0.6576	0.5027	0.735	0.2358
169	0.6667	0.5191	0.7404	0.2572
170	0.6576	0.4973	0.7377	0.2337
171	0.6576	0.4918	0.7404	0.2316
172	0.6594	0.4918	0.7432	0.2347
173	0.6539	0.4754	0.7432	0.2192
174	0.6576	0.4809	0.7459	0.2274
175	0.6557	0.4809	0.7432	0.2244
176	0.6557	0.4863	0.7404	0.2265
177	0.6485	0.4699	0.7377	0.2079
178	0.6393	0.4536	0.7322	0.1863
179	0.6539	0.4754	0.7432	0.2192
180	0.6576	0.4863	0.7432	0.2295
181	0.6503	0.4699	0.7404	0.211
182	0.6539	0.4809	0.7404	0.2213
183	0.6594	0.4809	0.7486	0.2305
184	0.6539	0.4754	0.7432	0.2192
185	0.6576	0.4809	0.7459	0.2274
186	0.663	0.4918	0.7486	0.2408
187	0.6667	0.4918	0.7541	0.2469
188	0.6667	0.4918	0.7541	0.2469
189	0.6594	0.4918	0.7432	0.2347
190	0.6612	0.4973	0.7432	0.2398
191	0.6612	0.4973	0.7432	0.2398
192	0.6667	0.5027	0.7486	0.251
193	0.6667	0.5027	0.7486	0.251
194	0.663	0.4918	0.7486	0.2408
195	0.6648	0.4863	0.7541	0.2418
196	0.6594	0.4645	0.7568	0.2242
197	0.6521	0.459	0.7486	0.2097
198	0.6539	0.4809	0.7404	0.2213
199	0.6576	0.4863	0.7432	0.2295
200	0.6466	0.4645	0.7377	0.2027
201	0.6521	0.4754	0.7404	0.2161
202	0.6466	0.459	0.7404	0.2006
203	0.6466	0.4699	0.735	0.2049
204	0.6448	0.4645	0.735	0.1997
205	0.6448	0.4699	0.7322	0.2019
206	0.6448	0.4645	0.735	0.1997
207	0.6521	0.4809	0.7377	0.2183
208	0.643	0.4754	0.7268	0.2011
209	0.6412	0.4699	0.7268	0.1959
210	0.6393	0.4754	0.7213	0.1952
211	0.6393	0.4699	0.724	0.193
212	0.6503	0.4809	0.735	0.2153
213	0.6466	0.4754	0.7322	0.2071
214	0.6357	0.4699	0.7186	0.187
215	0.6503	0.4863	0.7322	0.2174
216	0.6503	0.4699	0.7404	0.211
217	0.6576	0.4754	0.7486	0.2253
218	0.6594	0.4699	0.7541	0.2263
219	0.6539	0.4754	0.7432	0.2192
220	0.6466	0.4699	0.735	0.2049
221	0.6485	0.4863	0.7295	0.2144
222	0.6521	0.4754	0.7404	0.2161
223	0.6503	0.4973	0.7268	0.2217
224	0.6539	0.5027	0.7295	0.2299
225	0.6576	0.4973	0.7377	0.2337
226	0.6594	0.4973	0.7404	0.2368
227	0.6648	0.5027	0.7459	0.248
228	0.6612	0.4918	0.7459	0.2377
229	0.674	0.5082	0.7568	0.2654
230	0.674	0.5082	0.7568	0.2654
231	0.6758	0.5137	0.7568	0.2705
232	0.6648	0.4809	0.7568	0.2397
233	0.6594	0.4645	0.7568	0.2242
234	0.6594	0.4754	0.7514	0.2284
235	0.6648	0.4754	0.7596	0.2377
236	0.6667	0.4809	0.7596	0.2429
237	0.6612	0.4863	0.7486	0.2356
238	0.6612	0.4754	0.7541	0.2315
239	0.6594	0.4645	0.7568	0.2242
240	0.6594	0.4754	0.7514	0.2284
241	0.6594	0.4699	0.7541	0.2263
242	0.6594	0.459	0.7596	0.2221
243	0.6667	0.4809	0.7596	0.2429
244	0.6648	0.4809	0.7568	0.2397
245	0.6721	0.4918	0.7623	0.2563
246	0.6685	0.4863	0.7596	0.248
247	0.6685	0.4863	0.7596	0.248
248	0.6685	0.4918	0.7568	0.25
249	0.6648	0.4973	0.7486	0.2459
250	0.663	0.5027	0.7432	0.2449
251	0.6685	0.5082	0.7486	0.2561
252	0.6648	0.5082	0.7432	0.25
253	0.6576	0.5027	0.735	0.2358
254	0.6594	0.5082	0.735	0.241
255	0.6667	0.5082	0.7459	0.2531
256	0.6685	0.5137	0.7459	0.2582
257	0.6667	0.5082	0.7459	0.2531
258	0.6703	0.5027	0.7541	0.2572
259	0.6721	0.5027	0.7568	0.2603
260	0.6758	0.5137	0.7568	0.2705
261	0.6776	0.5137	0.7596	0.2736
262	0.6794	0.5246	0.7568	0.2807
263	0.6758	0.5191	0.7541	0.2725
264	0.674	0.5137	0.7541	0.2674
265	0.6721	0.5082	0.7541	0.2623
266	0.674	0.5137	0.7541	0.2674
267	0.6794	0.5246	0.7568	0.2807
268	0.6685	0.5301	0.7377	0.2644
269	0.6685	0.5246	0.7404	0.2623
270	0.6685	0.5191	0.7432	0.2602
271	0.6703	0.5301	0.7404	0.2674
272	0.6721	0.541	0.7377	0.2745
273	0.6776	0.541	0.7459	0.2836
274	0.6776	0.541	0.7459	0.2836
275	0.6776	0.541	0.7459	0.2836
276	0.6758	0.541	0.7432	0.2806
277	0.6794	0.5355	0.7514	0.2846
278	0.6831	0.541	0.7541	0.2928
279	0.6776	0.5519	0.7404	0.2876
280	0.674	0.5519	0.735	0.2816
281	0.6758	0.5574	0.735	0.2867
282	0.6758	0.541	0.7432	0.2806
283	0.6667	0.5355	0.7322	0.2634
284	0.6648	0.5301	0.7322	0.2584
285	0.674	0.5519	0.735	0.2816
286	0.6703	0.5574	0.7268	0.2778
287	0.6648	0.5355	0.7295	0.2605
288	0.6648	0.5246	0.735	0.2563
289	0.6557	0.5191	0.724	0.2393
290	0.6557	0.5191	0.724	0.2393
291	0.663	0.541	0.724	0.2596
292	0.6503	0.5301	0.7104	0.2348
293	0.6576	0.541	0.7158	0.2508
294	0.6594	0.541	0.7186	0.2537
295	0.663	0.5464	0.7213	0.2617
296	0.663	0.5519	0.7186	0.2639
297	0.6539	0.541	0.7104	0.245
298	0.6521	0.5355	0.7104	0.2399
299	0.6521	0.541	0.7077	0.2421
300	0.6557	0.5355	0.7158	0.2457
301	0.6612	0.5355	0.724	0.2545
302	0.6594	0.5246	0.7268	0.2473
303	0.6539	0.5246	0.7186	0.2385
304	0.6521	0.5301	0.7131	0.2377
305	0.663	0.5355	0.7268	0.2575
306	0.6612	0.5301	0.7268	0.2524
307	0.6557	0.5246	0.7213	0.2414
308	0.6594	0.5301	0.724	0.2494
309	0.6612	0.5301	0.7268	0.2524
310	0.6557	0.5246	0.7213	0.2414
311	0.6539	0.5137	0.724	0.2341
312	0.6521	0.5137	0.7213	0.2312
313	0.6503	0.5082	0.7213	0.2261
314	0.6485	0.4973	0.724	0.2188
315	0.6485	0.5082	0.7186	0.2231
316	0.6685	0.5301	0.7377	0.2644
317	0.6667	0.5301	0.735	0.2614
318	0.6685	0.5519	0.7268	0.2727
319	0.6703	0.5464	0.7322	0.2736
320	0.6594	0.5355	0.7213	0.2516
321	0.6576	0.5355	0.7186	0.2486
322	0.6594	0.5355	0.7213	0.2516
323	0.6648	0.5519	0.7213	0.2668
324	0.6685	0.5464	0.7295	0.2706
325	0.6667	0.541	0.7295	0.2655
326	0.6648	0.541	0.7268	0.2626
327	0.6667	0.5464	0.7268	0.2676
328	0.6667	0.5519	0.724	0.2698
329	0.6685	0.5464	0.7295	0.2706
330	0.6612	0.5355	0.724	0.2545
331	0.6594	0.5355	0.7213	0.2516
332	0.6648	0.5355	0.7295	0.2605
333	0.6648	0.5246	0.735	0.2563
334	0.6703	0.5519	0.7295	0.2757
335	0.6703	0.5519	0.7295	0.2757
336	0.6667	0.541	0.7295	0.2655
337	0.6685	0.5464	0.7295	0.2706
338	0.6703	0.5464	0.7322	0.2736
339	0.6703	0.5519	0.7295	0.2757
340	0.6721	0.5519	0.7322	0.2786
341	0.6721	0.5519	0.7322	0.2786
342	0.6685	0.5464	0.7295	0.2706
343	0.6703	0.5683	0.7213	0.282
344	0.6721	0.5519	0.7322	0.2786
345	0.6667	0.5464	0.7268	0.2676
346	0.6758	0.5628	0.7322	0.2887
347	0.6758	0.5628	0.7322	0.2887
348	0.6776	0.5628	0.735	0.2917
349	0.6612	0.5464	0.7186	0.2588
350	0.6612	0.5355	0.724	0.2545
351	0.6594	0.5355	0.7213	0.2516
352	0.6576	0.5355	0.7186	0.2486
353	0.6685	0.5355	0.735	0.2664
354	0.6721	0.541	0.7377	0.2745
355	0.6685	0.541	0.7322	0.2685
356	0.6667	0.5574	0.7213	0.2719
357	0.6594	0.5519	0.7131	0.258
358	0.6721	0.5738	0.7213	0.287
359	0.6758	0.5847	0.7213	0.2971
360	0.6758	0.5738	0.7268	0.2929
361	0.6794	0.5792	0.7295	0.3009
362	0.6812	0.5792	0.7322	0.3039
363	0.6831	0.5792	0.735	0.3068
364	0.6849	0.5847	0.735	0.3119
365	0.6849	0.5847	0.735	0.3119
366	0.6831	0.5792	0.735	0.3068
367	0.6849	0.5738	0.7404	0.3078
368	0.6867	0.5738	0.7432	0.3108
369	0.6849	0.5738	0.7404	0.3078
370	0.6849	0.5738	0.7404	0.3078
371	0.6849	0.5792	0.7377	0.3098
372	0.6849	0.5738	0.7404	0.3078
373	0.6831	0.5738	0.7377	0.3048
374	0.6885	0.5738	0.7459	0.3138
375	0.6867	0.5683	0.7459	0.3088
376	0.6794	0.5464	0.7459	0.2886
377	0.6758	0.5464	0.7404	0.2826
378	0.6758	0.5574	0.735	0.2867
379	0.6721	0.5464	0.735	0.2766
380	0.674	0.5519	0.735	0.2816
381	0.6776	0.5628	0.735	0.2917
382	0.6758	0.5628	0.7322	0.2887
383	0.6758	0.5519	0.7377	0.2846
384	0.6812	0.5683	0.7377	0.2998
385	0.6758	0.5683	0.7295	0.2908
386	0.6685	0.5519	0.7268	0.2727
387	0.6721	0.5628	0.7268	0.2828
388	0.674	0.5738	0.724	0.29
389	0.6721	0.5792	0.7186	0.2891
390	0.6703	0.5792	0.7158	0.2862
391	0.6721	0.5792	0.7186	0.2891
392	0.6721	0.5738	0.7213	0.287
393	0.6758	0.5847	0.7213	0.2971
394	0.6703	0.5847	0.7131	0.2884
395	0.674	0.5902	0.7158	0.2963
396	0.6758	0.5956	0.7158	0.3013
397	0.6867	0.5847	0.7377	0.3148
398	0.6849	0.5902	0.7322	0.3139
399	0.6831	0.5792	0.735	0.3068
400	0.6831	0.5738	0.7377	0.3048
401	0.6812	0.5738	0.735	0.3018
402	0.6812	0.5738	0.735	0.3018
403	0.6758	0.5792	0.724	0.295
404	0.6812	0.5902	0.7268	0.308
405	0.6849	0.5902	0.7322	0.3139
406	0.6831	0.5902	0.7295	0.3109
407	0.6867	0.5847	0.7377	0.3148
408	0.694	0.5847	0.7486	0.3269
409	0.6885	0.5628	0.7514	0.3099
410	0.6885	0.5683	0.7486	0.3118
411	0.6903	0.5738	0.7486	0.3169
412	0.694	0.5683	0.7568	0.321
413	0.6922	0.5628	0.7568	0.316
414	0.6922	0.5683	0.7541	0.3179
415	0.6849	0.5628	0.7459	0.3038
416	0.6812	0.5628	0.7404	0.2977
417	0.6794	0.5628	0.7377	0.2947
418	0.6812	0.5628	0.7404	0.2977
419	0.6721	0.5519	0.7322	0.2786
420	0.6721	0.5519	0.7322	0.2786
421	0.6831	0.5738	0.7377	0.3048
422	0.6831	0.5738	0.7377	0.3048
423	0.6831	0.5738	0.7377	0.3048
424	0.6831	0.5792	0.735	0.3068
425	0.6794	0.5792	0.7295	0.3009
426	0.6776	0.5738	0.7295	0.2959
427	0.6831	0.5738	0.7377	0.3048
428	0.6812	0.5738	0.735	0.3018
429	0.6812	0.5738	0.735	0.3018
430	0.6794	0.5683	0.735	0.2968
431	0.6776	0.5683	0.7322	0.2938
432	0.6794	0.5738	0.7322	0.2988
433	0.6721	0.5738	0.7213	0.287
434	0.6721	0.5683	0.724	0.2849
435	0.6721	0.5683	0.724	0.2849
436	0.6721	0.5683	0.724	0.2849
437	0.6703	0.5683	0.7213	0.282
438	0.6703	0.5683	0.7213	0.282
439	0.6812	0.5738	0.735	0.3018
440	0.6776	0.5628	0.735	0.2917
441	0.6758	0.5628	0.7322	0.2887
442	0.6776	0.5628	0.735	0.2917
443	0.6758	0.5628	0.7322	0.2887
444	0.6721	0.5683	0.724	0.2849
445	0.6721	0.5683	0.724	0.2849
446	0.6794	0.5738	0.7322	0.2988
447	0.6703	0.5683	0.7213	0.282
448	0.6667	0.5628	0.7186	0.274
449	0.6758	0.5683	0.7295	0.2908
450	0.674	0.5738	0.724	0.29
451	0.6648	0.5628	0.7158	0.2711
452	0.6648	0.5683	0.7131	0.2732
453	0.6721	0.5792	0.7186	0.2891
454	0.6685	0.5683	0.7186	0.279
455	0.6685	0.5738	0.7158	0.2812
456	0.6648	0.5628	0.7158	0.2711
457	0.6594	0.5628	0.7077	0.2624
458	0.6576	0.5628	0.7049	0.2595
459	0.6539	0.5738	0.694	0.2582
460	0.6576	0.5738	0.6995	0.2639
461	0.663	0.5628	0.7131	0.2682
462	0.6612	0.5628	0.7104	0.2653
463	0.663	0.5628	0.7131	0.2682
464	0.663	0.5683	0.7104	0.2703
465	0.6594	0.5683	0.7049	0.2645
466	0.6648	0.5683	0.7131	0.2732
467	0.6576	0.5683	0.7022	0.2617
468	0.6521	0.5519	0.7022	0.2465
469	0.6576	0.5574	0.7077	0.2573
470	0.6576	0.5628	0.7049	0.2595
471	0.6576	0.5574	0.7077	0.2573
472	0.6521	0.5574	0.6995	0.2487
473	0.6503	0.5628	0.694	0.248
474	0.6539	0.5519	0.7049	0.2493
475	0.6576	0.5574	0.7077	0.2573
476	0.6594	0.5574	0.7104	0.2602
477	0.6667	0.5628	0.7186	0.274
478	0.663	0.5519	0.7186	0.2639
479	0.6612	0.5464	0.7186	0.2588
480	0.6576	0.5464	0.7131	0.253
481	0.6576	0.5464	0.7131	0.253
482	0.6576	0.5464	0.7131	0.253
483	0.663	0.541	0.724	0.2596
484	0.6667	0.5519	0.724	0.2698
485	0.663	0.5464	0.7213	0.2617
486	0.663	0.541	0.724	0.2596
487	0.6648	0.5464	0.724	0.2647
488	0.6667	0.5464	0.7268	0.2676
489	0.6758	0.5574	0.735	0.2867
490	0.6721	0.541	0.7377	0.2745
491	0.6703	0.541	0.735	0.2715
492	0.6721	0.5519	0.7322	0.2786
493	0.6685	0.5574	0.724	0.2748
494	0.6703	0.541	0.735	0.2715
495	0.6648	0.541	0.7268	0.2626
496	0.6667	0.5301	0.735	0.2614
497	0.663	0.5301	0.7295	0.2554
498	0.6648	0.5246	0.735	0.2563
499	0.6612	0.5246	0.7295	0.2503
500	0.6612	0.5191	0.7322	0.2482
501	0.6594	0.5191	0.7295	0.2452
502	0.6703	0.541	0.735	0.2715
503	0.6648	0.5355	0.7295	0.2605
504	0.6612	0.5246	0.7295	0.2503
505	0.6703	0.541	0.735	0.2715
506	0.6703	0.5519	0.7295	0.2757
507	0.6667	0.5464	0.7268	0.2676
508	0.6667	0.5464	0.7268	0.2676
509	0.663	0.5464	0.7213	0.2617
510	0.6667	0.5519	0.724	0.2698
511	0.6667	0.541	0.7295	0.2655
512	0.6703	0.541	0.735	0.2715
513	0.674	0.5519	0.735	0.2816
514	0.6721	0.5519	0.7322	0.2786
515	0.6648	0.5355	0.7295	0.2605
516	0.6703	0.5464	0.7322	0.2736
517	0.6703	0.5464	0.7322	0.2736
518	0.6667	0.5355	0.7322	0.2634
519	0.6648	0.541	0.7268	0.2626
520	0.6648	0.5355	0.7295	0.2605
521	0.6557	0.5301	0.7186	0.2436
522	0.663	0.5519	0.7186	0.2639
523	0.6557	0.5355	0.7158	0.2457
524	0.6576	0.5355	0.7186	0.2486
525	0.6648	0.5519	0.7213	0.2668
526	0.6612	0.5464	0.7186	0.2588
527	0.6594	0.5519	0.7131	0.258
528	0.6594	0.5519	0.7131	0.258
529	0.663	0.5519	0.7186	0.2639
530	0.6576	0.5464	0.7131	0.253
531	0.6612	0.5519	0.7158	0.2609
532	0.6594	0.5519	0.7131	0.258
533	0.6576	0.5519	0.7104	0.2551
534	0.6576	0.5574	0.7077	0.2573
535	0.6557	0.5574	0.7049	0.2544
536	0.6557	0.5519	0.7077	0.2522
537	0.6521	0.5464	0.7049	0.2443
538	0.6503	0.541	0.7049	0.2392
539	0.6557	0.5464	0.7104	0.2501
540	0.6521	0.5464	0.7049	0.2443
541	0.6521	0.5464	0.7049	0.2443
542	0.6594	0.5519	0.7131	0.258
543	0.6576	0.5464	0.7131	0.253
544	0.6557	0.5464	0.7104	0.2501
545	0.6703	0.5683	0.7213	0.282
546	0.6667	0.5792	0.7104	0.2804
547	0.6612	0.5683	0.7077	0.2674
548	0.6576	0.5519	0.7104	0.2551
549	0.6576	0.5355	0.7186	0.2486
550	0.6539	0.5355	0.7131	0.2428
551	0.6594	0.5519	0.7131	0.258
552	0.6703	0.5683	0.7213	0.282
553	0.6648	0.5683	0.7131	0.2732
554	0.6667	0.5628	0.7186	0.274
555	0.6648	0.5628	0.7158	0.2711
556	0.663	0.5628	0.7131	0.2682
557	0.6667	0.5683	0.7158	0.2761
558	0.6667	0.5683	0.7158	0.2761
559	0.6685	0.5792	0.7131	0.2833
560	0.6667	0.5792	0.7104	0.2804
561	0.6648	0.5683	0.7131	0.2732
562	0.6648	0.5683	0.7131	0.2732
563	0.6594	0.5628	0.7077	0.2624
564	0.6557	0.5574	0.7049	0.2544
565	0.6594	0.5628	0.7077	0.2624
566	0.6612	0.5628	0.7104	0.2653
567	0.6594	0.5628	0.7077	0.2624
568	0.6612	0.5628	0.7104	0.2653
569	0.6612	0.5683	0.7077	0.2674
570	0.6612	0.5683	0.7077	0.2674
571	0.663	0.5683	0.7104	0.2703
572	0.674	0.5683	0.7268	0.2879
573	0.6721	0.5683	0.724	0.2849
574	0.6721	0.5683	0.724	0.2849
575	0.6703	0.5738	0.7186	0.2841
576	0.6721	0.5738	0.7213	0.287
577	0.6703	0.5628	0.724	0.2799
578	0.663	0.5464	0.7213	0.2617
579	0.6612	0.541	0.7213	0.2567
580	0.663	0.541	0.724	0.2596
581	0.6576	0.541	0.7158	0.2508
582	0.6557	0.5355	0.7158	0.2457
583	0.663	0.5464	0.7213	0.2617
584	0.6703	0.5574	0.7268	0.2778
585	0.6667	0.5519	0.724	0.2698
586	0.6612	0.541	0.7213	0.2567
587	0.6576	0.5355	0.7186	0.2486
588	0.6594	0.541	0.7186	0.2537
589	0.6612	0.5519	0.7158	0.2609
590	0.6612	0.541	0.7213	0.2567
591	0.6576	0.5464	0.7131	0.253
592	0.6594	0.5464	0.7158	0.2559
593	0.6576	0.541	0.7158	0.2508
594	0.6557	0.541	0.7131	0.2479
595	0.6594	0.541	0.7186	0.2537
596	0.6612	0.5464	0.7186	0.2588
597	0.6648	0.5519	0.7213	0.2668
598	0.6667	0.5464	0.7268	0.2676
599	0.6576	0.5355	0.7186	0.2486
600	0.6521	0.5246	0.7158	0.2355
601	0.6539	0.5246	0.7186	0.2385
602	0.6557	0.5301	0.7186	0.2436
603	0.6539	0.5301	0.7158	0.2406
604	0.6594	0.5301	0.724	0.2494
605	0.6576	0.5355	0.7186	0.2486
606	0.6539	0.5246	0.7186	0.2385
607	0.6557	0.5246	0.7213	0.2414
608	0.6576	0.5301	0.7213	0.2465
609	0.6594	0.5301	0.724	0.2494
610	0.6612	0.5301	0.7268	0.2524
611	0.6667	0.541	0.7295	0.2655
612	0.6594	0.5246	0.7268	0.2473
613	0.6612	0.5191	0.7322	0.2482
614	0.663	0.5191	0.735	0.2512
615	0.6703	0.5301	0.7404	0.2674
616	0.6721	0.5301	0.7432	0.2704
617	0.6703	0.5301	0.7404	0.2674
618	0.6703	0.5301	0.7404	0.2674
619	0.6667	0.5355	0.7322	0.2634
620	0.6612	0.5246	0.7295	0.2503
621	0.6667	0.5355	0.7322	0.2634
622	0.6576	0.5191	0.7268	0.2422
623	0.6576	0.5191	0.7268	0.2422
624	0.6594	0.5191	0.7295	0.2452
625	0.663	0.5355	0.7268	0.2575
626	0.6612	0.5301	0.7268	0.2524
627	0.6612	0.5301	0.7268	0.2524
628	0.6594	0.5246	0.7268	0.2473
629	0.6594	0.5191	0.7295	0.2452
630	0.6539	0.5082	0.7268	0.232
631	0.6557	0.5082	0.7295	0.235
632	0.6594	0.5027	0.7377	0.2389
633	0.6612	0.5082	0.7377	0.244
634	0.6557	0.5082	0.7295	0.235
635	0.6539	0.5137	0.724	0.2341
636	0.6539	0.5137	0.724	0.2341
637	0.6466	0.5082	0.7158	0.2202
638	0.6466	0.5082	0.7158	0.2202
639	0.6521	0.5191	0.7186	0.2334
640	0.6521	0.5191	0.7186	0.2334
641	0.6485	0.5191	0.7131	0.2275
642	0.6485	0.5191	0.7131	0.2275
643	0.6466	0.5191	0.7104	0.2246
644	0.6485	0.5191	0.7131	0.2275
645	0.6485	0.5246	0.7104	0.2297
646	0.6503	0.5191	0.7158	0.2304
