# Supplementary material for: Position-Specific Analysis and Prediction of Protein Pupylation Sites Based on Multiple Features
Source: Biomed Res Int. 2013 Aug 26;2013:109549. doi: 10.1155/2013/109549 (PMC3770009; doi:10.1155/2013/109549)
Supplement: Supplementary file 4 [file 109549.f4.txt]

1	433	AA11_pssm_12	0.057
2	413	AA10_pssm_7	0.020
3	22	AA11_sa_2	0.018
4	41	AA21_sa_1	0.010
5	353	AA7_pssm_7	0.011
6	158	AA20_electrostatic	0.008
7	422	AA10_pssm_16	0.008
8	606	AA19_pssm_20	0.005
9	378	AA8_pssm_12	0.005
10	493	AA14_pssm_7	0.007
11	430	AA11_pssm_4	0.009
12	294	AA4_pssm_8	0.005
13	268	AA3_pssm_2	0.005
14	468	AA13_pssm_2	0.005
15	510	AA15_pssm_4	0.005
16	458	AA12_pssm_12	0.005
17	388	AA9_pssm_2	0.004
18	356	AA7_pssm_10	0.004
19	427	AA11_pssm_1	0.005
20	642	AA21_pssm_16	0.004
21	8	AA4_sa_2	0.004
22	21	AA11_sa_1	0.006
23	573	AA18_pssm_7	0.004
24	314	AA5_pssm_8	0.004
25	495	AA14_pssm_9	0.004
26	529	AA16_pssm_3	0.003
27	65	AA1_structure	0.003
28	113	AA10_electrostatic	0.004
29	275	AA3_pssm_9	0.003
30	13	AA7_sa_1	0.003
31	507	AA15_pssm_1	0.003
32	255	AA2_pssm_9	0.003
33	603	AA19_pssm_17	0.003
34	593	AA19_pssm_7	0.002
35	442	AA11_pssm_16	0.003
36	106	AA9_molecular	0.003
37	635	AA21_pssm_9	0.002
38	89	AA6_Polarity	0.002
39	72	AA2_codon	0.002
40	142	AA17_codon	0.002
41	447	AA12_pssm_1	0.002
42	290	AA4_pssm_4	0.002
43	350	AA7_pssm_4	0.002
44	128	AA14_electrostatic	0.002
45	432	AA11_pssm_6	0.002
46	423	AA10_pssm_17	0.002
47	16	AA8_sa_2	0.002
48	612	AA20_pssm_6	0.002
49	283	AA3_pssm_17	0.002
50	218	AA19_ss_1	0.002
51	397	AA9_pssm_11	0.002
52	628	AA21_pssm_2	0.002
53	487	AA14_pssm_1	0.001
54	368	AA8_pssm_2	0.001
55	97	AA7_codon	0.001
56	412	AA10_pssm_6	0.001
57	411	AA10_pssm_5	0.001
58	262	AA2_pssm_16	0.001
59	27	AA14_sa_1	0.001
60	267	AA3_pssm_1	0.001
61	235	AA1_pssm_9	0.001
62	323	AA5_pssm_17	0.001
63	328	AA6_pssm_2	0.001
64	625	AA20_pssm_19	0.001
65	445	AA11_pssm_19	0.001
66	608	AA20_pssm_2	0.001
67	208	AA15_ss_3	0.001
68	443	AA11_pssm_17	0.001
69	421	AA10_pssm_15	0.000
70	120	AA13_structure	0.001
71	163	AA21_electrostatic	0.001
72	52	AA10_disorder	0.001
73	354	AA7_pssm_8	0.000
74	37	AA19_sa_1	0.000
75	374	AA8_pssm_8	0.000
76	526	AA15_pssm_20	0.000
77	490	AA14_pssm_4	0.000
78	534	AA16_pssm_8	0.000
79	566	AA17_pssm_20	0.000
80	372	AA8_pssm_6	0.000
81	611	AA20_pssm_5	0.000
82	347	AA7_pssm_1	0.000
83	428	AA11_pssm_2	0.000
84	195	AA11_ss_2	0.000
85	82	AA4_codon	-0.000
86	245	AA1_pssm_19	-0.000
87	14	AA7_sa_2	-0.000
88	260	AA2_pssm_14	-0.000
89	449	AA12_pssm_3	-0.000
90	222	AA20_ss_2	-0.000
91	485	AA13_pssm_19	-0.000
92	241	AA1_pssm_15	-0.000
93	303	AA4_pssm_17	-0.000
94	486	AA13_pssm_20	-0.000
95	578	AA18_pssm_12	-0.000
96	86	AA5_molecular	-0.000
97	535	AA16_pssm_9	-0.000
98	550	AA17_pssm_4	-0.000
99	505	AA14_pssm_19	-0.000
100	96	AA7_molecular	-0.000
101	6	AA3_sa_2	-0.000
102	637	AA21_pssm_11	-0.000
103	111	AA10_molecular	-0.000
104	403	AA9_pssm_17	-0.000
105	249	AA2_pssm_3	-0.000
106	613	AA20_pssm_7	-0.001
107	448	AA12_pssm_2	-0.000
108	359	AA7_pssm_13	-0.000
109	575	AA18_pssm_9	-0.000
110	178	AA5_ss_3	-0.001
111	396	AA9_pssm_10	-0.001
112	92	AA6_codon	-0.001
113	523	AA15_pssm_17	-0.001
